# Supplementary material for: Structural Speciation of Ti(IV)-(α-Hydroxycarboxylic Acid) Complexes in Metabolism-Related (Patho)Physiology—In Vitro Approaches to (Pre)Adipocyte Differentiation and Mineralization
Source: MDPI journal article supplement (doi:10.3390/ijms241411865), 2023-07-24

```
R(reflections)= 0.0424( 4113)      wR2(reflections)=
S = 1.000                        0.0832( 4113)
Npar= 334
```

---

The following ALERTS were generated. Each ALERT has the format

**test-name\_ALERT\_alert-type\_alert-level.**

Click on the hyperlinks for more details of the test.

---

### ● Alert level C

|                   |                                               |                |              |
|-------------------|-----------------------------------------------|----------------|--------------|
| PLAT041_ALERT_1_C | Calc. and Reported SumFormula                 | Strings Differ | Please Check |
| PLAT042_ALERT_1_C | Calc. and Reported MoietyFormula              | Strings Differ | Please Check |
| PLAT737_ALERT_1_C | D...A Calc 2.8944(15), Rep 2.894(5) .....     |                | 3.3 s.u.-R   |
|                   | O3 -O14 1_555 1_555 .....                     | #              | 1 Check      |
| PLAT737_ALERT_1_C | D...A Calc 3.0026(17), Rep 3.003(5) .....     |                | 2.9 s.u.-R   |
|                   | O9 -O14 1_555 1_555 .....                     | #              | 4 Check      |
| PLAT737_ALERT_1_C | D...A Calc 2.8837(17), Rep 2.884(5) .....     |                | 2.9 s.u.-R   |
|                   | O14 -O6 1_555 1_555 .....                     | #              | 15 Check     |
| PLAT911_ALERT_3_C | Missing FCF Refl Between Thmin & STh/L= 0.600 |                | 20 Report    |

---

### ● Alert level G

|                   |                                                  |             |
|-------------------|--------------------------------------------------|-------------|
| PLAT002_ALERT_2_G | Number of Distance or Angle Restraints on AtSite | 11 Note     |
| PLAT003_ALERT_2_G | Number of Uiso or Uij Restrained non-H Atoms ... | 3 Report    |
| PLAT007_ALERT_5_G | Number of Unrefined Donor-H Atoms .....          | 12 Report   |
| PLAT045_ALERT_1_G | Calculated and Reported Z Differ by a Factor ... | 0.500 Check |
| PLAT093_ALERT_1_G | No s.u.'s on H-positions, Refinement Reported as | mixed Check |
| PLAT300_ALERT_4_G | Atom Site Occupancy of C9 Constrained at         | 0.5 Check   |
| PLAT300_ALERT_4_G | Atom Site Occupancy of C10 Constrained at        | 0.5 Check   |
| PLAT300_ALERT_4_G | Atom Site Occupancy of C12 Constrained at        | 0.5 Check   |
| PLAT300_ALERT_4_G | Atom Site Occupancy of C18 Constrained at        | 0.5 Check   |
| PLAT300_ALERT_4_G | Atom Site Occupancy of C19 Constrained at        | 0.5 Check   |
| PLAT300_ALERT_4_G | Atom Site Occupancy of C20 Constrained at        | 0.5 Check   |
| PLAT300_ALERT_4_G | Atom Site Occupancy of C21 Constrained at        | 0.5 Check   |
| PLAT300_ALERT_4_G | Atom Site Occupancy of C22 Constrained at        | 0.5 Check   |
| PLAT300_ALERT_4_G | Atom Site Occupancy of H91 Constrained at        | 0.5 Check   |
| PLAT300_ALERT_4_G | Atom Site Occupancy of H92 Constrained at        | 0.5 Check   |
| PLAT300_ALERT_4_G | Atom Site Occupancy of H101 Constrained at       | 0.5 Check   |
| PLAT300_ALERT_4_G | Atom Site Occupancy of H102 Constrained at       | 0.5 Check   |
| PLAT300_ALERT_4_G | Atom Site Occupancy of H103 Constrained at       | 0.5 Check   |
| PLAT300_ALERT_4_G | Atom Site Occupancy of H113 Constrained at       | 0.5 Check   |
| PLAT300_ALERT_4_G | Atom Site Occupancy of H114 Constrained at       | 0.5 Check   |
| PLAT300_ALERT_4_G | Atom Site Occupancy of H115 Constrained at       | 0.5 Check   |
| PLAT300_ALERT_4_G | Atom Site Occupancy of H116 Constrained at       | 0.5 Check   |
| PLAT300_ALERT_4_G | Atom Site Occupancy of H121 Constrained at       | 0.5 Check   |
| PLAT300_ALERT_4_G | Atom Site Occupancy of H122 Constrained at       | 0.5 Check   |
| PLAT300_ALERT_4_G | Atom Site Occupancy of H123 Constrained at       | 0.5 Check   |
| PLAT300_ALERT_4_G | Atom Site Occupancy of H171 Constrained at       | 0.5 Check   |
| PLAT300_ALERT_4_G | Atom Site Occupancy of H172 Constrained at       | 0.5 Check   |
| PLAT300_ALERT_4_G | Atom Site Occupancy of H173 Constrained at       | 0.5 Check   |
| PLAT300_ALERT_4_G | Atom Site Occupancy of H174 Constrained at       | 0.5 Check   |
| PLAT300_ALERT_4_G | Atom Site Occupancy of H182 Constrained at       | 0.5 Check   |
| PLAT300_ALERT_4_G | Atom Site Occupancy of H183 Constrained at       | 0.5 Check   |
| PLAT300_ALERT_4_G | Atom Site Occupancy of H184 Constrained at       | 0.5 Check   |
| PLAT300_ALERT_4_G | Atom Site Occupancy of H191 Constrained at       | 0.5 Check   |
| PLAT300_ALERT_4_G | Atom Site Occupancy of H192 Constrained at       | 0.5 Check   |
| PLAT300_ALERT_4_G | Atom Site Occupancy of H201 Constrained at       | 0.5 Check   |
| PLAT300_ALERT_4_G | Atom Site Occupancy of H202 Constrained at       | 0.5 Check   |
| PLAT300_ALERT_4_G | Atom Site Occupancy of H203 Constrained at       | 0.5 Check   |
| PLAT300_ALERT_4_G | Atom Site Occupancy of H211 Constrained at       | 0.5 Check   |

|                                                                    |                |              |
|--------------------------------------------------------------------|----------------|--------------|
| PLAT300_ALERT_4_G Atom Site Occupancy of H212                      | Constrained at | 0.5 Check    |
| PLAT300_ALERT_4_G Atom Site Occupancy of H213                      | Constrained at | 0.5 Check    |
| PLAT300_ALERT_4_G Atom Site Occupancy of H221                      | Constrained at | 0.5 Check    |
| PLAT300_ALERT_4_G Atom Site Occupancy of H223                      | Constrained at | 0.5 Check    |
| PLAT300_ALERT_4_G Atom Site Occupancy of H224                      | Constrained at | 0.5 Check    |
| PLAT300_ALERT_4_G Atom Site Occupancy of H143                      | Constrained at | 0.5 Check    |
| PLAT300_ALERT_4_G Atom Site Occupancy of H144                      | Constrained at | 0.5 Check    |
| PLAT301_ALERT_3_G Main Residue Disorder .....(Resd 1 )             |                | 14% Note     |
| PLAT769_ALERT_4_G CIF Embedded explicitly supplied scattering data |                | Please Note  |
| PLAT808_ALERT_5_G No Parseable SHELXL Style Weighting Scheme Found |                | Please Check |
| PLAT860_ALERT_3_G Number of Least-Squares Restraints .....         |                | 18 Note      |
| PLAT882_ALERT_1_G No Datum for _diffn_reflns_av_unetI/netI .....   |                | Please Do !  |
| PLAT910_ALERT_3_G Missing # of FCF Reflection(s) Below Theta(Min). |                | 1 Note       |
| PLAT912_ALERT_4_G Missing # of FCF Reflections Above STh/L= 0.600  |                | 88 Note      |
| PLAT913_ALERT_3_G Missing # of Very Strong Reflections in FCF .... |                | 1 Note       |
| PLAT929_ALERT_5_G No Weight Pars,Obs and Calc R1,wR2,S not Checked |                | ! Info       |
| PLAT960_ALERT_3_G Number of Intensities with I < - 2*sig(I) ...    |                | 2 Check      |

---

0 **ALERT level A** = Most likely a serious problem - resolve or explain  
 0 **ALERT level B** = A potentially serious problem, consider carefully  
 6 **ALERT level C** = Check. Ensure it is not caused by an omission or oversight  
 55 **ALERT level G** = General information/check it is not something unexpected

8 ALERT type 1 CIF construction/syntax error, inconsistent or missing data  
 2 ALERT type 2 Indicator that the structure model may be wrong or deficient  
 6 ALERT type 3 Indicator that the structure quality may be low  
 42 ALERT type 4 Improvement, methodology, query or suggestion  
 3 ALERT type 5 Informative message, check

---

It is advisable to attempt to resolve as many as possible of the alerts in all categories. Often the minor alerts point to easily fixed oversights, errors and omissions in your CIF or refinement strategy, so attention to these fine details can be worthwhile. In order to resolve some of the more serious problems it may be necessary to carry out additional measurements or structure refinements. However, the purpose of your study may justify the reported deviations and the more serious of these should normally be commented upon in the discussion or experimental section of a paper or in the "special\_details" fields of the CIF. checkCIF was carefully designed to identify outliers and unusual parameters, but every test has its limitations and alerts that are not important in a particular case may appear. Conversely, the absence of alerts does not guarantee there are no aspects of the results needing attention. It is up to the individual to critically assess their own results and, if necessary, seek expert advice.

### **Publication of your CIF in IUCr journals**

A basic structural check has been run on your CIF. These basic checks will be run on all CIFs submitted for publication in IUCr journals (*Acta Crystallographica*, *Journal of Applied Crystallography*, *Journal of Synchrotron Radiation*); however, if you intend to submit to *Acta Crystallographica Section C* or *E* or *IUCrData*, you should make sure that full publication checks are run on the final version of your CIF prior to submission.

### **Publication of your CIF in other journals**

Please refer to the *Notes for Authors* of the relevant journal for any special instructions relating to CIF submission.

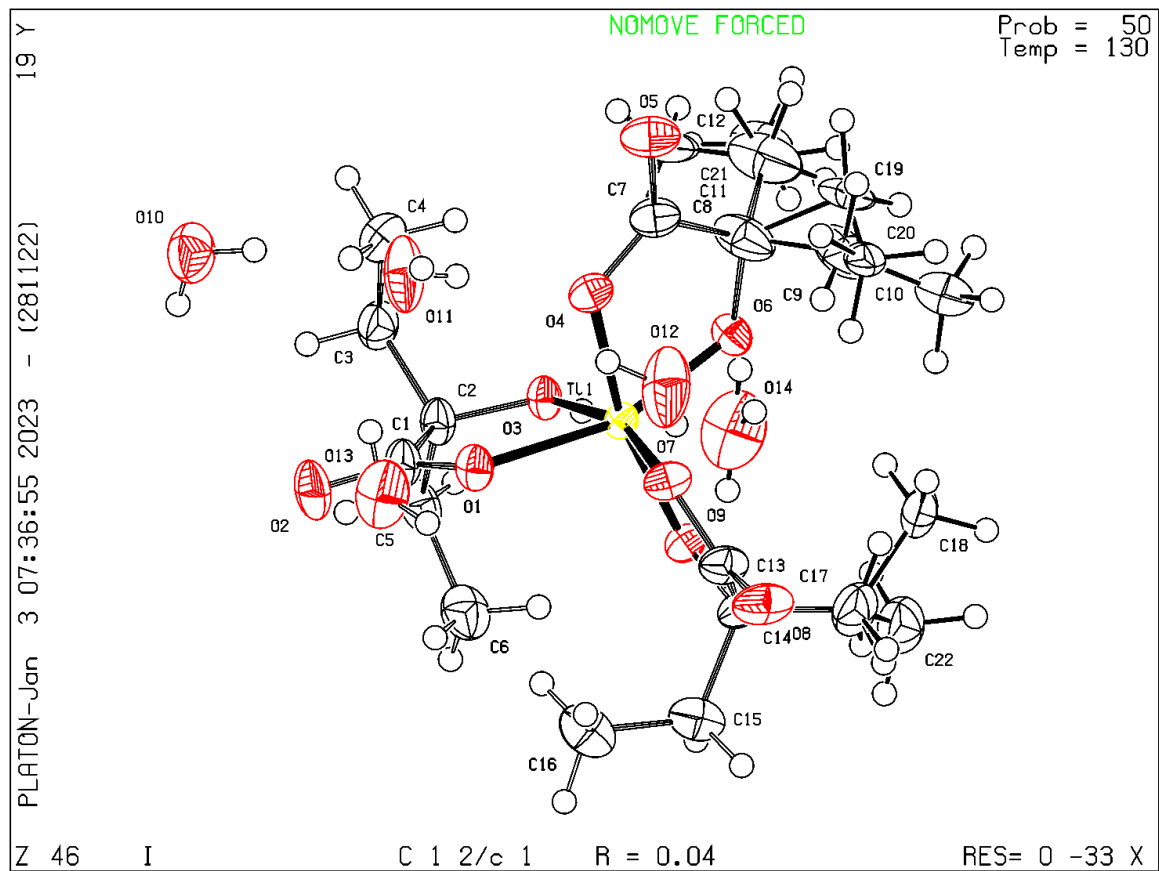

Supplement: s1 [file s1]
