# Supplementary material for: Structural Speciation of Ti(IV)-(α-Hydroxycarboxylic Acid) Complexes in Metabolism-Related (Patho)Physiology—In Vitro Approaches to (Pre)Adipocyte Differentiation and Mineralization
Source: MDPI journal article supplement (doi:10.3390/ijms241411865), 2023-07-24

## checkCIF/PLATON report

Structure factors have been supplied for datablock(s) I

THIS REPORT IS FOR GUIDANCE ONLY. IF USED AS PART OF A REVIEW PROCEDURE FOR PUBLICATION, IT SHOULD NOT REPLACE THE EXPERTISE OF AN EXPERIENCED CRYSTALLOGRAPHIC REFEREE.

No syntax errors found.      CIF dictionary      Interpreting this report

### Datablock: I

---

|                        |                                     |                                   |
|------------------------|-------------------------------------|-----------------------------------|
| Bond precision:        | C-C = 0.0059 A                      | Wavelength=0.71073                |
| Cell:                  | a=15.1689(6)                        | b=15.1689(6)      c=15.1689(6)    |
|                        | alpha=90                            | beta=90      gamma=90             |
| Temperature:           | 295 K                               |                                   |
|                        | Calculated                          | Reported                          |
| Volume                 | 3490.3(4)                           | 3490.3(4)                         |
| Space group            | P 21 3                              | P 21 3                            |
| Hall group             | P 2ac 2ab 3                         | ?                                 |
| Moiety formula         | C21 H30 O18 Ti, 2(H4 N),<br>2(H2 O) | C21 H41.99 N2.00 O20.00<br>Ti1.00 |
| Sum formula            | C21 H41.99 N2 O20 Ti                | C21 H41.99 N2.00 O20.00<br>Ti1.00 |
| Mr                     | 690.32                              | 690.35                            |
| Dx, g cm <sup>-3</sup> | 1.314                               | 1.314                             |
| Z                      | 4                                   | 4                                 |
| Mu (mm <sup>-1</sup> ) | 0.323                               | 0.323                             |
| F000                   | 1455.7                              | 1455.7                            |
| F000'                  | 1457.85                             |                                   |
| h, k, lmax             | 18, 18, 18                          | 12, 13, 18                        |
| Nref                   | 2382[ 1326]                         | 2392                              |
| Tmin, Tmax             | 0.940, 0.965                        | 0.950, 0.970                      |
| Tmin'                  | 0.940                               |                                   |

Correction method= # Reported T Limits: Tmin=0.950 Tmax=0.970

AbsCorr = NUMERICAL

Data completeness= 1.80/1.00

Theta(max)= 26.391

R(reflections)= 0.0531( 1927)

wR2(reflections)=  
0.1492( 1927)

S = 1.000

Npar= 151

The following ALERTS were generated. Each ALERT has the format

**test-name\_ALERT\_alert-type\_alert-level.**

Click on the hyperlinks for more details of the test.

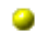

### Alert level C

|                   |                                                 |              |
|-------------------|-------------------------------------------------|--------------|
| PLAT042_ALERT_1_C | Calc. and Reported MoietyFormula Strings Differ | Please Check |
| PLAT076_ALERT_1_C | Occupancy 0.333 Less Than 1.0 for Sp.pos .      | N2           |
| PLAT076_ALERT_1_C | Occupancy 0.333 Less Than 1.0 for Sp.pos .      | H21          |
| PLAT420_ALERT_2_C | D-H Bond Without Acceptor N1 --H13 .            | Please Check |
| PLAT911_ALERT_3_C | Missing FCF Refl Between Thmin & STh/L= 0.600   | 8 Report     |

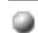

### Alert level G

|                   |                                                  |             |
|-------------------|--------------------------------------------------|-------------|
| PLAT002_ALERT_2_G | Number of Distance or Angle Restraints on AtSite | 6 Note      |
| PLAT007_ALERT_5_G | Number of Unrefined Donor-H Atoms .....          | 17 Report   |
| PLAT093_ALERT_1_G | No s.u.'s on H-positions, Refinement Reported as | mixed Check |
| PLAT300_ALERT_4_G | Atom Site Occupancy of T11 Constrained at        | 0.999 Check |
| PLAT300_ALERT_4_G | Atom Site Occupancy of N1 Constrained at         | 0.666 Check |
| PLAT300_ALERT_4_G | Atom Site Occupancy of H13 Constrained at        | 0.666 Check |
| PLAT300_ALERT_4_G | Atom Site Occupancy of H14 Constrained at        | 0.666 Check |
| PLAT300_ALERT_4_G | Atom Site Occupancy of N2 Constrained at         | 0.333 Check |
| PLAT300_ALERT_4_G | Atom Site Occupancy of H21 Constrained at        | 0.333 Check |
| PLAT300_ALERT_4_G | Atom Site Occupancy of H24 Constrained at        | 0.333 Check |
| PLAT300_ALERT_4_G | Atom Site Occupancy of O7 Constrained at         | 0.2 Check   |
| PLAT300_ALERT_4_G | Atom Site Occupancy of H71 Constrained at        | 0.2 Check   |
| PLAT300_ALERT_4_G | Atom Site Occupancy of H72 Constrained at        | 0.2 Check   |
| PLAT300_ALERT_4_G | Atom Site Occupancy of O8 Constrained at         | 0.2 Check   |
| PLAT300_ALERT_4_G | Atom Site Occupancy of H81 Constrained at        | 0.2 Check   |
| PLAT300_ALERT_4_G | Atom Site Occupancy of H82 Constrained at        | 0.2 Check   |
| PLAT300_ALERT_4_G | Atom Site Occupancy of O9 Constrained at         | 0.266 Check |
| PLAT300_ALERT_4_G | Atom Site Occupancy of H91 Constrained at        | 0.266 Check |
| PLAT300_ALERT_4_G | Atom Site Occupancy of H92 Constrained at        | 0.266 Check |
| PLAT300_ALERT_4_G | Atom Site Occupancy of N3 Constrained at         | 0.333 Check |
| PLAT300_ALERT_4_G | Atom Site Occupancy of H31 Constrained at        | 0.333 Check |
| PLAT300_ALERT_4_G | Atom Site Occupancy of H32 Constrained at        | 0.333 Check |
| PLAT300_ALERT_4_G | Atom Site Occupancy of H33 Constrained at        | 0.333 Check |
| PLAT300_ALERT_4_G | Atom Site Occupancy of H34 Constrained at        | 0.333 Check |
| PLAT301_ALERT_3_G | Main Residue Disorder .....(Resd 1 )             | 7% Note     |
| PLAT302_ALERT_4_G | Anion/Solvent/Minor-Residue Disorder (Resd 2 )   | 100% Note   |
| PLAT302_ALERT_4_G | Anion/Solvent/Minor-Residue Disorder (Resd 3 )   | 100% Note   |
| PLAT302_ALERT_4_G | Anion/Solvent/Minor-Residue Disorder (Resd 4 )   | 100% Note   |
| PLAT302_ALERT_4_G | Anion/Solvent/Minor-Residue Disorder (Resd 5 )   | 100% Note   |
| PLAT302_ALERT_4_G | Anion/Solvent/Minor-Residue Disorder (Resd 6 )   | 100% Note   |
| PLAT302_ALERT_4_G | Anion/Solvent/Minor-Residue Disorder (Resd 7 )   | 100% Note   |
| PLAT304_ALERT_4_G | Non-Integer Number of Atoms in ..... (Resd 2 )   | 3.33 Check  |
| PLAT304_ALERT_4_G | Non-Integer Number of Atoms in ..... (Resd 3 )   | 1.66 Check  |
| PLAT304_ALERT_4_G | Non-Integer Number of Atoms in ..... (Resd 4 )   | 0.60 Check  |
| PLAT304_ALERT_4_G | Non-Integer Number of Atoms in ..... (Resd 5 )   | 0.60 Check  |
| PLAT304_ALERT_4_G | Non-Integer Number of Atoms in ..... (Resd 6 )   | 0.80 Check  |
| PLAT304_ALERT_4_G | Non-Integer Number of Atoms in ..... (Resd 7 )   | 1.66 Check  |

|                   |                                                  |              |
|-------------------|--------------------------------------------------|--------------|
| PLAT769_ALERT_4_G | CIF Embedded explicitly supplied scattering data | Please Note  |
| PLAT791_ALERT_4_G | Model has Chirality at C4 (Sohnke SpGr)          | R Verify     |
| PLAT791_ALERT_4_G | Model has Chirality at C6 (Sohnke SpGr)          | R Verify     |
| PLAT808_ALERT_5_G | No Parseable SHELXL Style Weighting Scheme Found | Please Check |
| PLAT860_ALERT_3_G | Number of Least-Squares Restraints .....         | 7 Note       |
| PLAT882_ALERT_1_G | No Datum for _diffrn_reflms_av_unetI/netI .....  | Please Do !  |
| PLAT929_ALERT_5_G | No Weight Pars,Obs and Calc R1,wR2,S not Checked | ! Info       |
| PLAT960_ALERT_3_G | Number of Intensities with I < - 2*sig(I) ...    | 9 Check      |

---

0 **ALERT level A** = Most likely a serious problem - resolve or explain  
0 **ALERT level B** = A potentially serious problem, consider carefully  
5 **ALERT level C** = Check. Ensure it is not caused by an omission or oversight  
45 **ALERT level G** = General information/check it is not something unexpected

5 ALERT type 1 CIF construction/syntax error, inconsistent or missing data  
2 ALERT type 2 Indicator that the structure model may be wrong or deficient  
4 ALERT type 3 Indicator that the structure quality may be low  
36 ALERT type 4 Improvement, methodology, query or suggestion  
3 ALERT type 5 Informative message, check

---

It is advisable to attempt to resolve as many as possible of the alerts in all categories. Often the minor alerts point to easily fixed oversights, errors and omissions in your CIF or refinement strategy, so attention to these fine details can be worthwhile. In order to resolve some of the more serious problems it may be necessary to carry out additional measurements or structure refinements. However, the purpose of your study may justify the reported deviations and the more serious of these should normally be commented upon in the discussion or experimental section of a paper or in the "special\_details" fields of the CIF. checkCIF was carefully designed to identify outliers and unusual parameters, but every test has its limitations and alerts that are not important in a particular case may appear. Conversely, the absence of alerts does not guarantee there are no aspects of the results needing attention. It is up to the individual to critically assess their own results and, if necessary, seek expert advice.

### Publication of your CIF in IUCr journals

A basic structural check has been run on your CIF. These basic checks will be run on all CIFs submitted for publication in IUCr journals (*Acta Crystallographica*, *Journal of Applied Crystallography*, *Journal of Synchrotron Radiation*); however, if you intend to submit to *Acta Crystallographica Section C* or *E* or *IUCrData*, you should make sure that full publication checks are run on the final version of your CIF prior to submission.

### Publication of your CIF in other journals

Please refer to the *Notes for Authors* of the relevant journal for any special instructions relating to CIF submission.

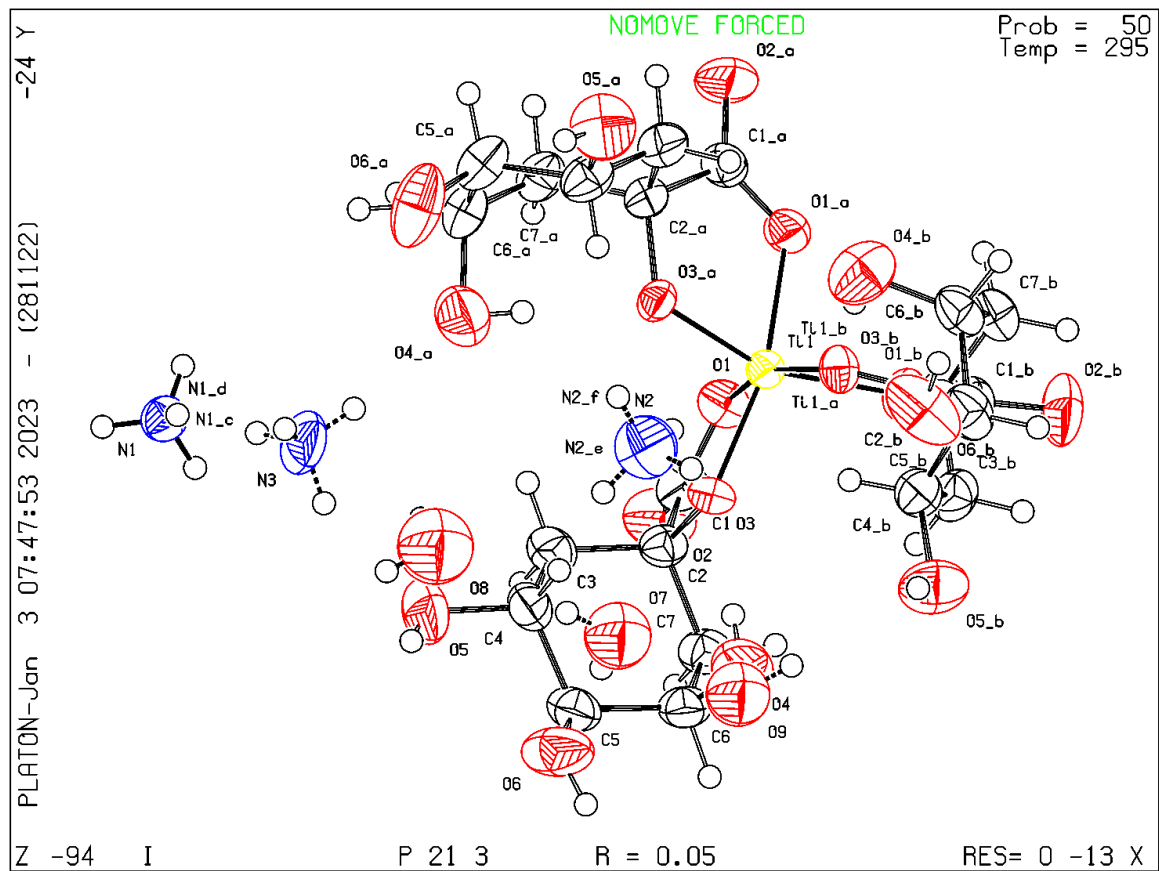

Supplement: s1 [file s1]
