# Supplementary material for: Structural Speciation of Ti(IV)-(α-Hydroxycarboxylic Acid) Complexes in Metabolism-Related (Patho)Physiology—In Vitro Approaches to (Pre)Adipocyte Differentiation and Mineralization
Source: MDPI journal article supplement (doi:10.3390/ijms241411865), 2023-07-24

---

The following ALERTS were generated. Each ALERT has the format

**test-name\_ALERT\_alert-type\_alert-level.**

Click on the hyperlinks for more details of the test.

---

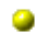

### Alert level C

|                   |                                                 |              |
|-------------------|-------------------------------------------------|--------------|
| PLAT042_ALERT_1_C | Calc. and Reported MoietyFormula Strings Differ | Please Check |
| PLAT420_ALERT_2_C | D-H Bond Without Acceptor N2 --H22 .            | Please Check |
| PLAT420_ALERT_2_C | D-H Bond Without Acceptor N3 --H274 .           | Please Check |
| PLAT911_ALERT_3_C | Missing FCF Refl Between Thmin & STh/L= 0.600   | 42 Report    |

---

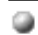

### Alert level G

|                   |                                                  |              |
|-------------------|--------------------------------------------------|--------------|
| PLAT007_ALERT_5_G | Number of Unrefined Donor-H Atoms .....          | 34 Report    |
| PLAT154_ALERT_1_G | The s.u.'s on the Cell Angles are Equal ..(Note) | 0.03 Degree  |
| PLAT300_ALERT_4_G | Atom Site Occupancy of O25 Constrained at        | 0.5 Check    |
| PLAT300_ALERT_4_G | Atom Site Occupancy of H251 Constrained at       | 0.5 Check    |
| PLAT300_ALERT_4_G | Atom Site Occupancy of H252 Constrained at       | 0.5 Check    |
| PLAT300_ALERT_4_G | Atom Site Occupancy of O26 Constrained at        | 0.25 Check   |
| PLAT300_ALERT_4_G | Atom Site Occupancy of H261 Constrained at       | 0.25 Check   |
| PLAT300_ALERT_4_G | Atom Site Occupancy of H262 Constrained at       | 0.25 Check   |
| PLAT300_ALERT_4_G | Atom Site Occupancy of O27 Constrained at        | 0.25 Check   |
| PLAT300_ALERT_4_G | Atom Site Occupancy of H271 Constrained at       | 0.25 Check   |
| PLAT300_ALERT_4_G | Atom Site Occupancy of H272 Constrained at       | 0.25 Check   |
| PLAT302_ALERT_4_G | Anion/Solvent/Minor-Residue Disorder (Resd 9 )   | 100% Note    |
| PLAT302_ALERT_4_G | Anion/Solvent/Minor-Residue Disorder (Resd 14 )  | 100% Note    |
| PLAT302_ALERT_4_G | Anion/Solvent/Minor-Residue Disorder (Resd 15 )  | 100% Note    |
| PLAT304_ALERT_4_G | Non-Integer Number of Atoms in ..... (Resd 9 )   | 1.50 Check   |
| PLAT304_ALERT_4_G | Non-Integer Number of Atoms in ..... (Resd 14 )  | 0.75 Check   |
| PLAT304_ALERT_4_G | Non-Integer Number of Atoms in ..... (Resd 15 )  | 0.75 Check   |
| PLAT769_ALERT_4_G | CIF Embedded explicitly supplied scattering data | Please Note  |
| PLAT794_ALERT_5_G | Tentative Bond Valency for Ti1 (IV) .            | 4.20 Info    |
| PLAT794_ALERT_5_G | Tentative Bond Valency for Ti2 (IV) .            | 4.17 Info    |
| PLAT808_ALERT_5_G | No Parseable SHELXL Style Weighting Scheme Found | Please Check |
| PLAT882_ALERT_1_G | No Datum for _diffrn_reflms_av_unetI/netI .....  | Please Do !  |
| PLAT912_ALERT_4_G | Missing # of FCF Reflections Above STh/L= 0.600  | 289 Note     |
| PLAT913_ALERT_3_G | Missing # of Very Strong Reflections in FCF .... | 3 Note       |
| PLAT929_ALERT_5_G | No Weight Pars,Obs and Calc R1,wR2,S not Checked | ! Info       |

---

- 0 **ALERT level A** = Most likely a serious problem - resolve or explain  
0 **ALERT level B** = A potentially serious problem, consider carefully  
4 **ALERT level C** = Check. Ensure it is not caused by an omission or oversight  
25 **ALERT level G** = General information/check it is not something unexpected
- 3 ALERT type 1 CIF construction/syntax error, inconsistent or missing data  
2 ALERT type 2 Indicator that the structure model may be wrong or deficient  
2 ALERT type 3 Indicator that the structure quality may be low  
17 ALERT type 4 Improvement, methodology, query or suggestion  
5 ALERT type 5 Informative message, check
- 
-

It is advisable to attempt to resolve as many as possible of the alerts in all categories. Often the minor alerts point to easily fixed oversights, errors and omissions in your CIF or refinement strategy, so attention to these fine details can be worthwhile. In order to resolve some of the more serious problems it may be necessary to carry out additional measurements or structure refinements. However, the purpose of your study may justify the reported deviations and the more serious of these should normally be commented upon in the discussion or experimental section of a paper or in the "special\_details" fields of the CIF. checkCIF was carefully designed to identify outliers and unusual parameters, but every test has its limitations and alerts that are not important in a particular case may appear. Conversely, the absence of alerts does not guarantee there are no aspects of the results needing attention. It is up to the individual to critically assess their own results and, if necessary, seek expert advice.

### **Publication of your CIF in IUCr journals**

A basic structural check has been run on your CIF. These basic checks will be run on all CIFs submitted for publication in IUCr journals (*Acta Crystallographica*, *Journal of Applied Crystallography*, *Journal of Synchrotron Radiation*); however, if you intend to submit to *Acta Crystallographica Section C* or *E* or *IUCrData*, you should make sure that full publication checks are run on the final version of your CIF prior to submission.

### **Publication of your CIF in other journals**

Please refer to the *Notes for Authors* of the relevant journal for any special instructions relating to CIF submission.

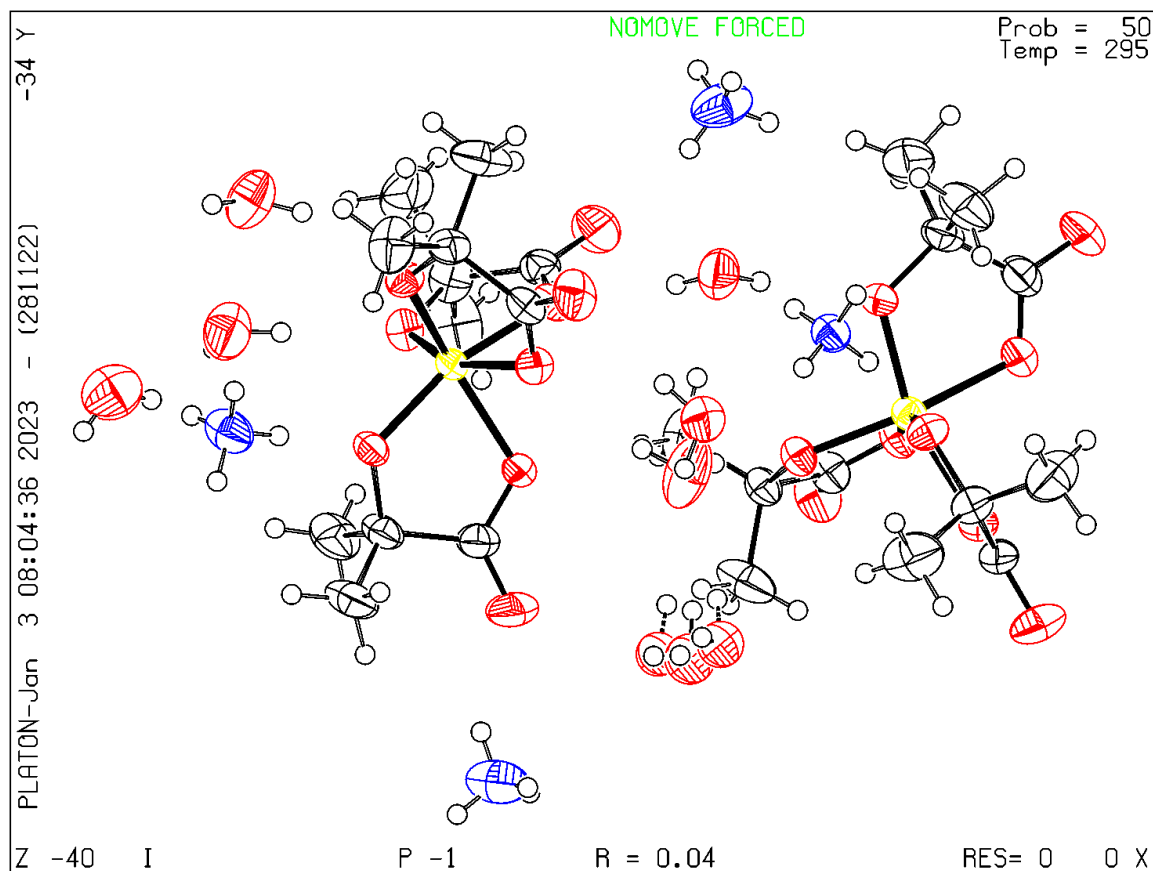

Supplement: s1 [file s1]
