# Supplementary material for: Structural Speciation of Ti(IV)-(α-Hydroxycarboxylic Acid) Complexes in Metabolism-Related (Patho)Physiology—In Vitro Approaches to (Pre)Adipocyte Differentiation and Mineralization
Source: MDPI journal article supplement (doi:10.3390/ijms241411865), 2023-07-24
Supplement: s1 [file s1]

**Table S10**

Experimental details

|                                                                                                                |                                                                           |
|----------------------------------------------------------------------------------------------------------------|---------------------------------------------------------------------------|
| Crystal data                                                                                                   |                                                                           |
| Chemical formula                                                                                               | C <sub>18</sub> H <sub>41</sub> O <sub>13.50</sub> Ti                     |
| <i>M<sub>r</sub></i>                                                                                           | 521.42                                                                    |
| Crystal system, space group                                                                                    | Monoclinic, <i>C2/c</i>                                                   |
| Temperature (K)                                                                                                | 130                                                                       |
| <i>a</i> , <i>b</i> , <i>c</i> (Å)                                                                             | 17.017 (2), 11.3810 (15), 27.743 (3)                                      |
| β (°)                                                                                                          | 101.800 (3)                                                               |
| <i>V</i> (Å <sup>3</sup> )                                                                                     | 5259.3 (11)                                                               |
| <i>Z</i>                                                                                                       | 8                                                                         |
| Radiation type                                                                                                 | Mo <i>K</i> α                                                             |
| μ (mm <sup>-1</sup> )                                                                                          | 0.39                                                                      |
| Crystal size (mm)                                                                                              | 0.11 × 0.09 × 0.06                                                        |
| Data collection                                                                                                |                                                                           |
| Diffractometer                                                                                                 | Bruker Kappa Apex2                                                        |
| Absorption correction                                                                                          | Numerical<br>Analytical Absorption (De Meulenaer & Tompa, 1965)           |
| <i>T<sub>min</sub></i> , <i>T<sub>max</sub></i>                                                                | 0.97, 0.98                                                                |
| No. of measured, independent<br>and<br>observed [ <i>I</i> > 2.0σ( <i>I</i> )]<br>reflections                  | 28368, 5231, 4113                                                         |
| <i>R<sub>int</sub></i>                                                                                         | 0.017                                                                     |
| (sin θ/λ) <sub>max</sub> (Å <sup>-1</sup> )                                                                    | 0.623                                                                     |
| Refinement                                                                                                     |                                                                           |
| <i>R</i> [ <i>F</i> <sup>2</sup> > 2σ( <i>F</i> <sup>2</sup> )], <i>wR</i> ( <i>F</i> <sup>2</sup> ), <i>S</i> | 0.042, 0.082, 1.00                                                        |
| No. of reflections                                                                                             | 4113                                                                      |
| No. of parameters                                                                                              | 334                                                                       |
| No. of restraints                                                                                              | 18                                                                        |
| H-atom treatment                                                                                               | H atoms treated by a mixture of independent and constrained<br>refinement |
| Δρ <sub>max</sub> , Δρ <sub>min</sub> (e Å <sup>-3</sup> )                                                     | 0.65, -0.53                                                               |

Computer programs: Apex2 (Bruker AXS, 2006), *SUPERFLIP* (Palatinus & Chapuis, 2007), *CRYSTALS* (Betteridge *et al.*, 2003), *CAMERON* (Watkin *et al.*, 1996).

**Table S11**

Selected geometric parameters (Å, °)

|            |             |             |             |
|------------|-------------|-------------|-------------|
| Ti1—O1     | 2.0605 (16) | C1—C2       | 1.554 (3)   |
| Ti1—O3     | 1.8675 (16) | C2—C3       | 1.499 (3)   |
| Ti1—O4     | 2.0340 (16) | C3—C4       | 1.509 (4)   |
| Ti1—O6     | 1.8582 (16) | C5—C6       | 1.529 (4)   |
| Ti1—O7     | 2.0445 (16) | C7—C8       | 1.510 (4)   |
| Ti1—O9     | 1.8493 (16) | C8—C11      | 1.466 (4)   |
| O1—C1      | 1.272 (3)   | C8—C19      | 1.4991 (10) |
| O2—C1      | 1.227 (3)   | C9—C10      | 1.5005 (10) |
| O3—C2      | 1.410 (3)   | C11—C21     | 1.4997 (10) |
| O4—C7      | 1.272 (3)   | C13—C14     | 1.525 (3)   |
| O5—C7      | 1.227 (3)   | C14—C15     | 1.517 (4)   |
| O6—C8      | 1.389 (3)   | C14—C17     | 1.507 (4)   |
| O7—C13     | 1.303 (3)   | C15—C16     | 1.504 (4)   |
| O8—C13     | 1.233 (3)   | C17—C22     | 1.4987 (10) |
| O9—C14     | 1.417 (3)   | C19—C20     | 1.4999 (10) |
| O1—Ti1—O3  | 77.99 (6)   | O3—C2—C3    | 110.1 (2)   |
| O1—Ti1—O4  | 84.76 (7)   | C2—C3—C4    | 115.9 (2)   |
| O3—Ti1—O4  | 103.72 (7)  | C2—C5—C6    | 115.4 (2)   |
| O1—Ti1—O6  | 160.50 (7)  | O4—C7—O5    | 125.8 (2)   |
| O3—Ti1—O6  | 95.93 (7)   | O4—C7—C8    | 113.0 (2)   |
| O4—Ti1—O6  | 78.66 (7)   | O5—C7—C8    | 121.1 (2)   |
| O1—Ti1—O7  | 85.08 (7)   | C7—C8—O6    | 109.3 (2)   |
| O3—Ti1—O7  | 161.19 (7)  | C7—C8—C11   | 117.0 (3)   |
| O4—Ti1—O7  | 82.60 (7)   | O6—C8—C11   | 110.7 (2)   |
| O6—Ti1—O7  | 102.71 (7)  | C7—C8—C19   | 114.6 (3)   |
| O1—Ti1—O9  | 103.53 (7)  | O6—C8—C19   | 124.2 (3)   |
| O3—Ti1—O9  | 97.60 (7)   | C11—C8—C19  | 77.9 (3)    |
| O4—Ti1—O9  | 158.35 (7)  | C8—C9—C10   | 127.8 (5)   |
| O6—Ti1—O9  | 95.60 (7)   | C8—C11—C21  | 140.3 (4)   |
| O7—Ti1—O9  | 78.31 (7)   | O7—C13—O8   | 122.7 (2)   |
| Ti1—O1—C1  | 117.07 (14) | O7—C13—C14  | 114.37 (19) |
| Ti1—O3—C2  | 124.39 (13) | O8—C13—C14  | 122.9 (2)   |
| Ti1—O4—C7  | 117.73 (15) | C13—C14—O9  | 106.17 (18) |
| Ti1—O6—C8  | 121.24 (15) | C13—C14—C15 | 110.5 (2)   |
| Ti1—O7—C13 | 116.83 (14) | O9—C14—C15  | 109.9 (2)   |
| Ti1—O9—C14 | 123.86 (14) | C13—C14—C17 | 108.8 (2)   |
| O1—C1—O2   | 124.4 (2)   | O9—C14—C17  | 111.0 (2)   |
| O1—C1—C2   | 115.35 (19) | C15—C14—C17 | 110.4 (2)   |

|          |             |             |           |
|----------|-------------|-------------|-----------|
| O2—C1—C2 | 120.3 (2)   | C14—C15—C16 | 114.5 (2) |
| C1—C2—O3 | 105.14 (18) | C14—C17—C22 | 125.1 (3) |
| C1—C2—C3 | 110.2 (2)   | C8—C19—C20  | 99.9 (4)  |

**Table S12**

Hydrogen-bond geometry (Å, °)

| <i>D</i> —H $\cdots$ <i>A</i>       | <i>D</i> —H | H $\cdots$ <i>A</i> | <i>D</i> $\cdots$ <i>A</i> | <i>D</i> —H $\cdots$ <i>A</i> |
|-------------------------------------|-------------|---------------------|----------------------------|-------------------------------|
| O3—H31 $\cdots$ O14                 | 0.83        | 2.14                | 2.894 (5)                  | 150                           |
| C20—H91 $\cdots$ C11                | 1.08        | 2.54                | 3.252 (5)                  | 123                           |
| C20—H92 $\cdots$ O6                 | 0.76        | 2.45                | 2.996 (5)                  | 129                           |
| O9—H94 $\cdots$ O14                 | 0.82        | 2.41                | 3.003 (5)                  | 130                           |
| C10—H102 $\cdots$ C18               | 0.96        | 1.96                | 2.882 (5)                  | 160                           |
| O10—H106 $\cdots$ O11               | 0.82        | 2.05                | 2.848 (5)                  | 166                           |
| O10—H107 $\cdots$ O12 <sup>i</sup>  | 0.82        | 1.97                | 2.768 (5)                  | 165                           |
| O11—H111 $\cdots$ O2 <sup>ii</sup>  | 0.82        | 1.87                | 2.684 (5)                  | 168                           |
| O11—H112 $\cdots$ O4                | 0.82        | 2.00                | 2.819 (5)                  | 173                           |
| O12—H126 $\cdots$ O2 <sup>ii</sup>  | 0.82        | 2.09                | 2.844 (5)                  | 154                           |
| O12—H127 $\cdots$ O7                | 0.82        | 2.04                | 2.830 (5)                  | 160                           |
| O13—H131 $\cdots$ O11               | 0.83        | 2.18                | 2.897 (5)                  | 144                           |
| O13—H132 $\cdots$ O8 <sup>iii</sup> | 0.83        | 2.01                | 2.791 (5)                  | 156                           |
| C18—H183 $\cdots$ O6                | 0.96        | 2.59                | 3.342 (5)                  | 135                           |
| O14—H143 $\cdots$ O6                | 0.82        | 2.14                | 2.884 (5)                  | 151                           |
| C18—H172 $\cdots$ C13               | 0.77        | 2.47                | 3.186 (5)                  | 155                           |
| C18—H172 $\cdots$ C14               | 0.77        | 1.99                | 2.656 (5)                  | 145                           |
| C18—H172 $\cdots$ C17               | 0.77        | 0.95                | 1.499 (5)                  | 121                           |
| C22—H174 $\cdots$ C14               | 0.78        | 1.99                | 2.667 (5)                  | 146                           |
| C22—H174 $\cdots$ C15               | 0.78        | 2.55                | 3.296 (5)                  | 161                           |
| C22—H174 $\cdots$ C17               | 0.78        | 0.95                | 1.499 (5)                  | 120                           |

Symmetry codes: (i)  $-x+3/2, y-1/2, -z+3/2$ ; (ii)  $-x+3/2, y+1/2, -z+3/2$ ; (iii)  $-x+2, y, -z+3/2$ .

Supporting information

## ► Crystallographic data

Acknowledgements

Funding information

References

43. Bruker Analytical X-ray Systems, Inc. Apex2, Version 2 User Manual, M86-E01078; Bruker Analytical X-ray Systems, Inc: Madison, WI, USA, 2006.
46. Betteridge, P.W.; Carruthers, J.R.; Cooper, R.I.; Prout, K.; Watkin, D.J.J. CRYSTALS version 12: software for guided crystal structure analysis. *Appl. Cryst.* 2003, 36, 1487. <https://doi.org/10.1107/S0021889803021800>.
49. De Meulenaer, J.; Tompa, H. The absorption correction in crystal structure analysis. *Acta Cryst.* **1965**, 19, 1014-1018. <https://doi.org/10.1107/S0365110X65004802>.
50. Prince, E. *Mathematical Techniques in Crystallography and Materials Science*; Springer: New York, NY, USA, 1982.
51. Watkin, D.J. The control of difficult refinements. *Acta Cryst.* **1994**, A50, 411–437. <https://doi.org/10.1107/S0108767393012784>.
52. Watkin, D.J.; Prout, C.K.; Pearce, L.J. *CAMERON*; Chemical Crystallography Laboratory: Oxford, UK, 1996.
53. Flack, H.D. On enantiomorph-polarity estimation. *Acta Cryst.* **1983**, A39, 876–881. <https://doi.org/10.1107/S0108767383001762>.
