# Supplementary material for: Structural Speciation of Ti(IV)-(α-Hydroxycarboxylic Acid) Complexes in Metabolism-Related (Patho)Physiology—In Vitro Approaches to (Pre)Adipocyte Differentiation and Mineralization
Source: MDPI journal article supplement (doi:10.3390/ijms241411865), 2023-07-24
Supplement: s1 [file s1]

**Table S7**

## Experimental details

## Crystal data

Chemical formula  $\text{C}_{21}\text{H}_{41.99}\text{N}_{2.00}\text{O}_{20.00}\text{Ti}_{1.00}$  $M_r$  690.35Crystal system, space group Cubic,  $P2_13$ 

Temperature (K) 295

 $a$  (Å) 15.1689 (6) $V$  (Å<sup>3</sup>) 3490.3 (4) $Z$  4Radiation type Mo  $K\alpha$  $\mu$  (mm<sup>-1</sup>) 0.32Crystal size (mm)  $0.19 \times 0.16 \times 0.11$ 

## Data collection

Diffractometer Bruker Kappa Apex2

Absorption correction Numerical  
Analytical Absorption (De Meulenaer & Tompa, 1965) $T_{\min}$ ,  $T_{\max}$  0.95, 0.97No. of measured, independent  
and  
observed [ $I > 2.0\sigma(I)$ ]  
reflections 13087, 2392, 1927 $R_{\text{int}}$  0.056 $(\sin \theta/\lambda)_{\max}$  (Å<sup>-1</sup>) 0.625

## Refinement

 $R[F^2 > 2\sigma(F^2)]$ ,  $wR(F^2)$ ,  $S$  0.053, 0.137, 1.00

No. of reflections 1927

No. of parameters 151

No. of restraints 7

H-atom treatment H atoms treated by a mixture of independent and constrained  
refinement $\Delta\rho_{\max}$ ,  $\Delta\rho_{\min}$  (e Å<sup>-3</sup>) 0.49, -0.29

Absolute structure Flack (1983), 1067 Friedel-pairs

Absolute structure parameter -0.02 (6)

Computer programs: Apex2 (Bruker AXS, 2006), *SUPERFLIP* (Palatinus & Chapuis, 2007),  
*CRYSTALS* (Betteridge *et al.*, 2003), *CAMERON* (Watkin *et al.*, 1996).

**Table S8**

Selected geometric parameters (Å, °)

|                                        |             |          |           |
|----------------------------------------|-------------|----------|-----------|
| Ti1—O1 <sup>i</sup>                    | 2.039 (3)   | O5—C4    | 1.427 (5) |
| Ti1—O1 <sup>ii</sup>                   | 2.039 (3)   | O6—C5    | 1.437 (6) |
| Ti1—O3 <sup>ii</sup>                   | 1.866 (2)   | C1—C2    | 1.511 (5) |
| Ti1—O3 <sup>i</sup>                    | 1.866 (2)   | C2—C3    | 1.531 (6) |
| Ti1—O1                                 | 2.039 (3)   | C2—C7    | 1.532 (5) |
| Ti1—O3                                 | 1.866 (2)   | C3—C4    | 1.529 (6) |
| O1—C1                                  | 1.270 (5)   | C4—C5    | 1.503 (6) |
| O2—C1                                  | 1.238 (5)   | C5—C6    | 1.530 (6) |
| O3—C2                                  | 1.406 (4)   | C6—C7    | 1.518 (6) |
| O4—C6                                  | 1.416 (6)   |          |           |
| O1 <sup>i</sup> —Ti1—O1 <sup>ii</sup>  | 83.76 (13)  | O2—C1—C2 | 122.6 (4) |
| O1 <sup>i</sup> —Ti1—O3 <sup>ii</sup>  | 104.19 (11) | C1—C2—O3 | 107.0 (3) |
| O1 <sup>ii</sup> —Ti1—O3 <sup>ii</sup> | 78.57 (11)  | C1—C2—C3 | 109.6 (3) |
| O1 <sup>i</sup> —Ti1—O3 <sup>i</sup>   | 78.57 (11)  | O3—C2—C3 | 109.9 (3) |
| O1 <sup>ii</sup> —Ti1—O3 <sup>i</sup>  | 159.59 (11) | C1—C2—C7 | 112.6 (3) |
| O3 <sup>ii</sup> —Ti1—O3 <sup>i</sup>  | 95.87 (11)  | O3—C2—C7 | 108.3 (3) |
| O1 <sup>i</sup> —Ti1—O1                | 83.76 (13)  | C3—C2—C7 | 109.4 (4) |
| O1 <sup>ii</sup> —Ti1—O1               | 83.76 (13)  | C2—C3—C4 | 111.2 (3) |
| O3 <sup>ii</sup> —Ti1—O1               | 159.59 (11) | C3—C4—O5 | 110.3 (4) |
| O3 <sup>i</sup> —Ti1—O1                | 104.19 (11) | C3—C4—C5 | 111.6 (4) |
| O1 <sup>i</sup> —Ti1—O3                | 159.59 (11) | O5—C4—C5 | 110.6 (4) |
| O1 <sup>ii</sup> —Ti1—O3               | 104.19 (11) | C4—C5—O6 | 107.1 (4) |
| O3 <sup>ii</sup> —Ti1—O3               | 95.87 (11)  | C4—C5—C6 | 112.0 (4) |
| O3 <sup>i</sup> —Ti1—O3                | 95.87 (11)  | O6—C5—C6 | 110.6 (4) |
| O1—Ti1—O3                              | 78.57 (11)  | C5—C6—O4 | 112.1 (4) |
| Ti1—O1—C1                              | 116.7 (2)   | C5—C6—C7 | 111.6 (4) |
| Ti1—O3—C2                              | 121.8 (2)   | O4—C6—C7 | 111.2 (4) |
| O1—C1—O2                               | 122.3 (4)   | C2—C7—C6 | 110.6 (3) |
| O1—C1—C2                               | 115.2 (3)   |          |           |

Symmetry codes: (i)  $-z+3/2, -x+1, y+1/2$ ; (ii)  $-y+1, z-1/2, -x+3/2$ .**Table S9**

Hydrogen-bond geometry (Å, °)

|                               |             |                     |                            |                               |
|-------------------------------|-------------|---------------------|----------------------------|-------------------------------|
| <i>D</i> —H $\cdots$ <i>A</i> | <i>D</i> —H | H $\cdots$ <i>A</i> | <i>D</i> $\cdots$ <i>A</i> | <i>D</i> —H $\cdots$ <i>A</i> |
|-------------------------------|-------------|---------------------|----------------------------|-------------------------------|

|                            |      |      |           |     |
|----------------------------|------|------|-----------|-----|
| O7—H72···O6                | 0.82 | 2.10 | 2.922 (6) | 179 |
| O7—H71···O8                | 0.82 | 2.17 | 2.987 (6) | 178 |
| N3—H32···O4 <sup>i</sup>   | 0.85 | 1.95 | 2.741 (6) | 153 |
| N3—H31···O5                | 0.86 | 2.00 | 2.808 (6) | 155 |
| N3—H34···N1                | 0.85 | 2.15 | 2.907 (6) | 147 |
| N3—H33···O7 <sup>iii</sup> | 0.86 | 2.02 | 2.883 (6) | 177 |
| O9—H91···O4                | 0.82 | 2.01 | 2.825 (6) | 179 |
| O9—H92···O5 <sup>ii</sup>  | 0.82 | 2.19 | 3.010 (6) | 179 |
| O8—H81···O4 <sup>iv</sup>  | 0.79 | 2.30 | 3.086 (6) | 175 |
| O8—H82···O7 <sup>i</sup>   | 0.82 | 1.66 | 2.278 (6) | 130 |
| O8—H82···O9 <sup>i</sup>   | 0.82 | 2.19 | 3.011 (6) | 176 |
| O6—H97···O1 <sup>v</sup>   | 0.82 | 2.49 | 3.031 (6) | 124 |
| O6—H97···O2 <sup>v</sup>   | 0.82 | 2.16 | 2.978 (6) | 180 |
| O5—H98···O5 <sup>vi</sup>  | 0.77 | 2.16 | 2.896 (6) | 160 |
| O4—H99···O3                | 0.82 | 1.85 | 2.668 (6) | 179 |
| O4—H99···C2                | 0.82 | 2.32 | 3.011 (6) | 142 |
| N1—H14···O2 <sup>vii</sup> | 0.85 | 2.00 | 2.793 (6) | 155 |

Symmetry codes: (i)  $-z+3/2, -x+1, y+1/2$ ; (ii)  $-y+1, z-1/2, -x+3/2$ ; (iii)  $y+1/2, -z+3/2, -x+1$ ; (iv)  $-x+1, y+1/2, -z+3/2$ ; (v)  $x-1/2, -y+1/2, -z+1$ ; (vi)  $y, z, x$ ; (vii)  $z+1/2, -x+3/2, -y+1$ .

Supporting information

## ► Crystallographic data

Acknowledgements

Funding information

References

43. Bruker Analytical X-ray Systems, Inc. Apex2, Version 2 User Manual, M86-E01078; Bruker Analytical X-ray Systems, Inc: Madison, WI, USA, 2006.
46. Betteridge, P.W.; Carruthers, J.R.; Cooper, R.I.; Prout, K.; Watkin, D.J.J. CRYSTALS version 12: software for guided crystal structure analysis. *Appl. Cryst.* 2003, 36, 1487. <https://doi.org/10.1107/S0021889803021800>.
49. De Meulenaer, J.; Tompa, H. The absorption correction in crystal structure analysis. *Acta Cryst.* **1965**, 19, 1014–1018. <https://doi.org/10.1107/S0365110X65004802>.
50. Prince, E. *Mathematical Techniques in Crystallography and Materials Science*; Springer: New York, NY, USA, 1982.
51. Watkin, D.J. The control of difficult refinements. *Acta Cryst.* **1994**, A50, 411–437. <https://doi.org/10.1107/S0108767393012784>.

52. Watkin, D.J.; Prout, C.K.; Pearce, L.J. *CAMERON*; Chemical Crystallography Laboratory: Oxford, UK, 1996.
53. Flack, H.D. On enantiomorph-polarity estimation. *Acta Cryst.* **1983**, A39, 876–881. <https://doi.org/10.1107/S0108767383001762>.
