# Supplementary material for: Structural Speciation of Ti(IV)-(α-Hydroxycarboxylic Acid) Complexes in Metabolism-Related (Patho)Physiology—In Vitro Approaches to (Pre)Adipocyte Differentiation and Mineralization
Source: MDPI journal article supplement (doi:10.3390/ijms241411865), 2023-07-24
Supplement: s1 [file s1]

**Table S1**

## Experimental details

|                                                                                                                |                                                                                |
|----------------------------------------------------------------------------------------------------------------|--------------------------------------------------------------------------------|
| Crystal data                                                                                                   |                                                                                |
| Chemical formula                                                                                               | C <sub>24</sub> H <sub>66</sub> N <sub>4</sub> O <sub>25</sub> Ti <sub>2</sub> |
| <i>M</i> <sub>r</sub>                                                                                          | 906.60                                                                         |
| Crystal system, space group                                                                                    | Triclinic, <i>P</i> -1                                                         |
| Temperature (K)                                                                                                | 295                                                                            |
| <i>a</i> , <i>b</i> , <i>c</i> (Å)                                                                             | 10.530 (6), 11.531 (6), 18.946 (11)                                            |
| α, β, γ (°)                                                                                                    | 89.09 (3), 89.82 (3), 80.80 (3)                                                |
| <i>V</i> (Å <sup>3</sup> )                                                                                     | 2270 (2)                                                                       |
| <i>Z</i>                                                                                                       | 2                                                                              |
| Radiation type                                                                                                 | Mo <i>K</i> α                                                                  |
| μ (mm <sup>-1</sup> )                                                                                          | 0.43                                                                           |
| Crystal size (mm)                                                                                              | 0.26 × 0.16 × 0.13                                                             |
| Data collection                                                                                                |                                                                                |
| Diffractometer                                                                                                 | Bruker Kappa Apex2                                                             |
| Absorption correction                                                                                          | Numerical<br>Analytical Absorption (De Meulenaer & Tompa, 1965)                |
| <i>T</i> <sub>min</sub> , <i>T</i> <sub>max</sub>                                                              | 0.93, 0.95                                                                     |
| No. of measured, independent and<br>observed [ <i>I</i> > 2.0σ( <i>I</i> )] reflections                        | 69918, 9847, 8419                                                              |
| <i>R</i> <sub>int</sub>                                                                                        | 0.015                                                                          |
| (sin θ/λ) <sub>max</sub> (Å <sup>-1</sup> )                                                                    | 0.643                                                                          |
| Refinement                                                                                                     |                                                                                |
| <i>R</i> [ <i>F</i> <sup>2</sup> > 2σ( <i>F</i> <sup>2</sup> )], <i>wR</i> ( <i>F</i> <sup>2</sup> ), <i>S</i> | 0.041, 0.062, 1.00                                                             |
| No. of reflections                                                                                             | 8419                                                                           |
| No. of parameters                                                                                              | 499                                                                            |
| H-atom treatment                                                                                               | H-atom parameters constrained                                                  |
| Δρ <sub>max</sub> , Δρ <sub>min</sub> (e Å <sup>-3</sup> )                                                     | 0.26, -0.34                                                                    |

Computer programs: Apex2 (Bruker AXS, 2006), *SUPERFLIP* (Palatinus & Chapuis, 2007), *CRYSTALS* (Betteridge *et al.*, 2003), *CAMERON* (Watkin *et al.*, 1996).

**Table S2**

## Selected geometric parameters (Å, °)

|        |             |         |           |
|--------|-------------|---------|-----------|
| Ti1—O1 | 2.0378 (16) | O13—C17 | 1.281 (2) |
| Ti1—O3 | 1.8742 (15) | O14—C17 | 1.235 (2) |
| Ti1—O4 | 2.0644 (16) | O15—C18 | 1.428 (2) |

|             |             |            |             |
|-------------|-------------|------------|-------------|
| Ti1—O6      | 1.8639 (15) | O16—C21    | 1.281 (2)   |
| Ti1—O7      | 2.0363 (17) | O17—C21    | 1.232 (2)   |
| Ti1—O9      | 1.8703 (15) | O18—C22    | 1.432 (2)   |
| Ti2—O10     | 2.0546 (17) | C1—C2      | 1.528 (3)   |
| Ti2—O12     | 1.8679 (15) | C2—C3      | 1.524 (3)   |
| Ti2—O13     | 2.0414 (17) | C2—C4      | 1.522 (3)   |
| Ti2—O15     | 1.8666 (15) | C5—C6      | 1.542 (3)   |
| Ti2—O16     | 2.0474 (17) | C6—C7      | 1.518 (3)   |
| Ti2—O18     | 1.8817 (15) | C6—C8      | 1.509 (3)   |
| O1—C1       | 1.297 (2)   | C9—C10     | 1.533 (3)   |
| O2—C1       | 1.224 (2)   | C10—C11    | 1.524 (3)   |
| O3—C2       | 1.430 (2)   | C10—C12    | 1.531 (3)   |
| O4—C5       | 1.274 (2)   | C13—C14    | 1.511 (3)   |
| O5—C5       | 1.238 (2)   | C14—C15    | 1.531 (3)   |
| O6—C6       | 1.420 (2)   | C14—C16    | 1.522 (3)   |
| O7—C9       | 1.289 (2)   | C17—C18    | 1.535 (3)   |
| O8—C9       | 1.229 (2)   | C18—C19    | 1.517 (3)   |
| O9—C10      | 1.431 (2)   | C18—C20    | 1.517 (3)   |
| O10—C13     | 1.271 (2)   | C21—C22    | 1.529 (3)   |
| O11—C13     | 1.244 (2)   | C22—C23    | 1.506 (3)   |
| O12—C14     | 1.424 (2)   | C22—C24    | 1.523 (3)   |
| O1—Ti1—O3   | 78.95 (6)   | C1—C2—C4   | 109.6 (2)   |
| O1—Ti1—O4   | 80.72 (7)   | O3—C2—C4   | 109.1 (2)   |
| O3—Ti1—O4   | 158.42 (6)  | C3—C2—C4   | 112.0 (2)   |
| O1—Ti1—O6   | 101.93 (7)  | O4—C5—O5   | 122.94 (19) |
| O3—Ti1—O6   | 98.05 (7)   | O4—C5—C6   | 115.23 (16) |
| O4—Ti1—O6   | 79.15 (7)   | O5—C5—C6   | 121.83 (17) |
| O1—Ti1—O7   | 83.54 (7)   | C5—C6—O6   | 106.91 (15) |
| O3—Ti1—O7   | 103.48 (8)  | C5—C6—C7   | 109.48 (18) |
| O4—Ti1—O7   | 81.22 (8)   | O6—C6—C7   | 108.59 (16) |
| O6—Ti1—O7   | 158.44 (6)  | C5—C6—C8   | 110.45 (17) |
| O1—Ti1—O9   | 160.26 (5)  | O6—C6—C8   | 109.98 (17) |
| O3—Ti1—O9   | 95.52 (8)   | C7—C6—C8   | 111.30 (19) |
| O4—Ti1—O9   | 106.06 (6)  | O7—C9—O8   | 122.7 (2)   |
| O6—Ti1—O9   | 97.59 (7)   | O7—C9—C10  | 113.95 (17) |
| O7—Ti1—O9   | 79.33 (6)   | O8—C9—C10  | 123.30 (19) |
| O10—Ti2—O12 | 78.46 (6)   | C9—C10—O9  | 106.56 (15) |
| O10—Ti2—O13 | 81.99 (8)   | C9—C10—C11 | 108.83 (18) |

|             |             |             |             |
|-------------|-------------|-------------|-------------|
| O12—Ti2—O13 | 158.67 (6)  | O9—C10—C11  | 108.87 (18) |
| O10—Ti2—O15 | 104.53 (7)  | C9—C10—C12  | 111.18 (19) |
| O12—Ti2—O15 | 96.88 (7)   | O9—C10—C12  | 110.21 (17) |
| O13—Ti2—O15 | 79.81 (7)   | C11—C10—C12 | 111.06 (18) |
| O10—Ti2—O16 | 83.22 (7)   | O10—C13—O11 | 122.93 (18) |
| O12—Ti2—O16 | 101.00 (7)  | O10—C13—C14 | 116.25 (16) |
| O13—Ti2—O16 | 84.96 (8)   | O11—C13—C14 | 120.82 (18) |
| O15—Ti2—O16 | 161.65 (6)  | C13—C14—O12 | 106.37 (15) |
| O10—Ti2—O18 | 160.75 (6)  | C13—C14—C15 | 110.61 (17) |
| O12—Ti2—O18 | 98.69 (8)   | O12—C14—C15 | 109.98 (16) |
| O13—Ti2—O18 | 102.58 (7)  | C13—C14—C16 | 109.75 (17) |
| O15—Ti2—O18 | 94.70 (7)   | O12—C14—C16 | 107.85 (17) |
| O16—Ti2—O18 | 78.62 (6)   | C15—C14—C16 | 112.08 (19) |
| Ti1—O1—C1   | 117.38 (12) | O13—C17—O14 | 122.2 (2)   |
| Ti1—O3—C2   | 122.08 (12) | O13—C17—C18 | 115.72 (17) |
| Ti1—O4—C5   | 115.81 (12) | O14—C17—C18 | 122.12 (19) |
| Ti1—O6—C6   | 121.39 (12) | C17—C18—O15 | 106.12 (16) |
| Ti1—O7—C9   | 116.65 (12) | C17—C18—C19 | 112.81 (19) |
| Ti1—O9—C10  | 119.33 (11) | O15—C18—C19 | 108.74 (17) |
| Ti2—O10—C13 | 116.23 (12) | C17—C18—C20 | 107.97 (19) |
| Ti2—O12—C14 | 122.39 (11) | O15—C18—C20 | 109.97 (18) |
| Ti2—O13—C17 | 115.67 (13) | C19—C18—C20 | 111.1 (2)   |
| Ti2—O15—C18 | 120.59 (12) | O16—C21—O17 | 123.35 (18) |
| Ti2—O16—C21 | 117.47 (12) | O16—C21—C22 | 115.07 (16) |
| Ti2—O18—C22 | 122.02 (11) | O17—C21—C22 | 121.57 (18) |
| O1—C1—O2    | 123.1 (2)   | C21—C22—O18 | 106.71 (16) |
| O1—C1—C2    | 114.51 (17) | C21—C22—C23 | 110.05 (18) |
| O2—C1—C2    | 122.42 (19) | O18—C22—C23 | 109.17 (18) |
| C1—C2—O3    | 106.95 (16) | C21—C22—C24 | 108.65 (18) |
| C1—C2—C3    | 110.3 (2)   | O18—C22—C24 | 109.06 (17) |
| O3—C2—C3    | 108.72 (19) | C23—C22—C24 | 113.0 (2)   |

**Table S3**  
Hydrogen-bond geometry (Å, °)

| <i>D</i> —H $\cdots$ <i>A</i>      | <i>D</i> —H | H $\cdots$ <i>A</i> | <i>D</i> $\cdots$ <i>A</i> | <i>D</i> —H $\cdots$ <i>A</i> |
|------------------------------------|-------------|---------------------|----------------------------|-------------------------------|
| O25—H252 $\cdots$ O14 <sup>i</sup> | 0.83        | 2.14                | 2.909 (3)                  | 153                           |
| O25—H251 $\cdots$ O20              | 0.83        | 2.18                | 2.958 (3)                  | 156                           |
| O26—H251 $\cdots$ O20              | 0.90        | 2.18                | 2.909 (3)                  | 138                           |

|                               |      |      |           |     |
|-------------------------------|------|------|-----------|-----|
| O26—H261···O14 <sup>i</sup>   | 0.83 | 2.59 | 3.347 (3) | 153 |
| O26—H262···O20                | 0.83 | 2.16 | 2.909 (3) | 150 |
| O27—H271···O14 <sup>i</sup>   | 0.83 | 1.69 | 2.475 (3) | 158 |
| O27—H271···C17 <sup>i</sup>   | 0.83 | 2.39 | 3.168 (3) | 155 |
| O25—H272···O20                | 1.04 | 2.10 | 2.958 (3) | 137 |
| O27—H272···O20                | 0.83 | 2.10 | 2.899 (3) | 160 |
| C7—H72···O27 <sup>ii</sup>    | 0.96 | 2.43 | 3.340 (3) | 159 |
| C23—H232···O27                | 0.96 | 2.55 | 3.344 (3) | 140 |
| N2—H21···O19 <sup>iii</sup>   | 0.83 | 2.01 | 2.800 (3) | 157 |
| N2—H24···O21                  | 0.86 | 2.20 | 2.757 (3) | 123 |
| N2—H23···O17 <sup>ii</sup>    | 0.82 | 1.94 | 2.749 (3) | 166 |
| N3—H273···O23 <sup>iv</sup>   | 0.83 | 2.35 | 3.156 (3) | 166 |
| N3—H34···O8                   | 0.83 | 2.00 | 2.728 (3) | 147 |
| N3—H275···O11 <sup>i</sup>    | 0.82 | 2.23 | 2.785 (3) | 126 |
| N3—H275···O24 <sup>v</sup>    | 0.82 | 2.32 | 2.829 (3) | 121 |
| N1—H11···O18                  | 0.88 | 1.93 | 2.793 (3) | 167 |
| N1—H13···O19                  | 0.88 | 1.98 | 2.805 (3) | 156 |
| N1—H14···O5 <sup>iii</sup>    | 0.87 | 1.94 | 2.789 (3) | 169 |
| N1—H12···O21                  | 0.87 | 2.11 | 2.958 (3) | 165 |
| O19—H282···O5                 | 0.85 | 1.99 | 2.831 (3) | 169 |
| O19—H281···O14 <sup>i</sup>   | 0.83 | 1.91 | 2.737 (3) | 169 |
| O22—H222···O3                 | 0.85 | 1.98 | 2.814 (3) | 168 |
| O22—H221···O11 <sup>vi</sup>  | 0.82 | 2.10 | 2.775 (3) | 139 |
| O21—H212···O15                | 0.85 | 2.01 | 2.829 (3) | 160 |
| O21—H211···O1                 | 0.83 | 2.04 | 2.832 (3) | 160 |
| O24—H283···O22                | 0.82 | 2.22 | 2.908 (3) | 141 |
| O23—H285···O6                 | 0.84 | 2.06 | 2.856 (3) | 158 |
| O23—H286···O10 <sup>vii</sup> | 0.85 | 2.19 | 2.949 (3) | 149 |
| N4—H277···O16 <sup>vii</sup>  | 0.89 | 2.49 | 3.225 (3) | 141 |
| N4—H277···O17 <sup>vii</sup>  | 0.89 | 2.07 | 2.867 (3) | 149 |
| N4—H277···C21 <sup>vii</sup>  | 0.89 | 2.58 | 3.421 (3) | 157 |
| N4—H44···O9                   | 0.91 | 2.00 | 2.897 (3) | 168 |
| N4—H276···O2 <sup>i</sup>     | 0.91 | 1.90 | 2.797 (3) | 168 |
| N4—H278···O24                 | 0.79 | 2.06 | 2.836 (3) | 165 |
| O20—H279···O4                 | 0.83 | 2.37 | 3.043 (3) | 138 |
| O20—H279···O7                 | 0.83 | 2.23 | 2.941 (3) | 143 |
| O20—H280···O12                | 0.83 | 1.99 | 2.803 (3) | 167 |

Symmetry codes: (i)  $x-1, y, z$ ; (ii)  $x, y+1, z$ ; (iii)  $-x+1, -y+1, -z+2$ ; (iv)  $x, y-1, z$ ; (v)  $-x, -y+1, -z+1$ ; (vi)  $-x+1, -y+1, -z+1$ ; (vii)  $x-1, y+1, z$ .

Supporting information

## ► Crystallographic data

Acknowledgements

Funding information

References

43. Bruker Analytical X-ray Systems, Inc. Apex2, Version 2 User Manual, M86-E01078; Bruker Analytical X-ray Systems, Inc: Madison, WI, USA, 2006.
46. Betteridge, P.W.; Carruthers, J.R.; Cooper, R.I.; Prout, K.; Watkin, D.J.J. CRYSTALS version 12: software for guided crystal structure analysis. *Appl. Cryst.* 2003, 36, 1487. <https://doi.org/10.1107/S0021889803021800>.
49. De Meulenaer, J.; Tompa, H. The absorption correction in crystal structure analysis. *Acta Cryst.* **1965**, 19, 1014-1018. <https://doi.org/10.1107/S0365110X65004802>.
50. Prince, E. *Mathematical Techniques in Crystallography and Materials Science*; Springer: New York, NY, USA, 1982.
51. Watkin, D.J. The control of difficult refinements. *Acta Cryst.* **1994**, A50, 411-437. <https://doi.org/10.1107/S0108767393012784>.
52. Watkin, D.J.; Prout, C.K.; Pearce, L.J. *CAMERON*; Chemical Crystallography Laboratory: Oxford, UK, 1996.
53. Flack, H.D. On enantiomorph-polarity estimation. *Acta Cryst.* **1983**, A39, 876-881. <https://doi.org/10.1107/S0108767383001762>.
