# Supplementary material for: Structural Speciation of Ti(IV)-(α-Hydroxycarboxylic Acid) Complexes in Metabolism-Related (Patho)Physiology—In Vitro Approaches to (Pre)Adipocyte Differentiation and Mineralization
Source: MDPI journal article supplement (doi:10.3390/ijms241411865), 2023-07-24
Supplement: s1 [file s1]

## Supplementary Information

**Structural speciation of Ti(IV)-( $\alpha$ -hydroxycarboxylic acid) complexes in metabolism-related (patho)physiology. *In vitro* approaches to (pre)adipocyte differentiation and mineralization.**

**Olga Tsave<sup>1</sup>, Catherine Iordanidou<sup>1</sup>, Antonios Hatzidimitriou<sup>2</sup>, Maria P. Yavropoulou<sup>3</sup>, Eva N. Kassi<sup>4,5</sup>, Narjes Nasiri-Ansari<sup>4</sup>, Catherine Gabriel<sup>1</sup>, Athanasios Salifoglou<sup>1,\*</sup>**

\* Author to whom correspondence should be addressed.

Tel: +30-2310-996-179, E-mail: [salif@auth.gr](mailto:salif@auth.gr)

<sup>1</sup> Laboratory of Inorganic Chemistry and Advanced Materials, School of Chemical Engineering, Aristotle University of Thessaloniki, Thessaloniki 54124, Greece

<sup>2</sup> Laboratory of Inorganic Chemistry, School of Chemistry, Aristotle University of Thessaloniki, Thessaloniki 54124, Greece

<sup>3</sup> Endocrinology Unit, 1<sup>st</sup> Department of Propaedeutic and Internal Medicine, Medical School, National and Kapodistrian University of Athens, Athens 11527, Greece.

<sup>4</sup> Department of Biological Chemistry, Medical School, National and Kapodistrian University of Athens, Athens 11527, Greece.

<sup>5</sup> Endocrine Oncology Unit, 1<sup>st</sup> Department of Propaedeutic and Internal Medicine, Laiko Hospital, National and Kapodistrian University of Athens, Athens 11527, Greece.

## Figure Captions

**Figure S1:** ESI-MS spectrum of compound **1** in water (positive mode). Full scan spectrum, and simulated spectrum:  $M_1 = [\text{Ti}(\text{L}_1)_3]$ , ( $m/z = 357.0683$ ,  $z = 1$ ,  $[\text{M}_1\text{H}_3]^+$ ).

**Figure S2:** ESI-MS spectrum of compound **2** in water (positive mode). Full scan spectrum, and simulated spectrum:  $M_2 = [\text{Ti}(\text{L}_1)_3((\text{CH}_6\text{N}_3)_2)]$ , ( $m/z = 475.1627$ ,  $z = 1$ ,  $[\text{M}_2\text{H}]^+$ ).

**Figure S3:** ESI-MS spectrum of compound **3** in water (positive mode). Full scan spectrum, and simulated spectrum:  $M_{3\_1} = [\text{Ti}(\text{L}_2)_3]$ , ( $m/z = 621.1262$ ,  $z = 1$ ,  $[\text{M}_{3\_1}\text{H}_3]^+$ ) and  $M_{3\_2} = [\text{Ti}(\text{L}_2)_2]$ , ( $m/z = 429.0590$ ,  $z = 1$ ,  $[\text{M}_{3\_2}\text{H}]^+$ ).

**Figure S4:** ESI-MS spectrum of compound **4** in water (positive mode). Full scan spectrum, and simulated spectrum:  $M_4 = [\text{Ti}(\text{L}_3\text{H})_2(\text{L}_3)]$ , ( $m/z = 479.1509$ ,  $z = 1$ ,  $[\text{M}_4\text{K}]^+$ ).

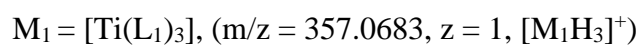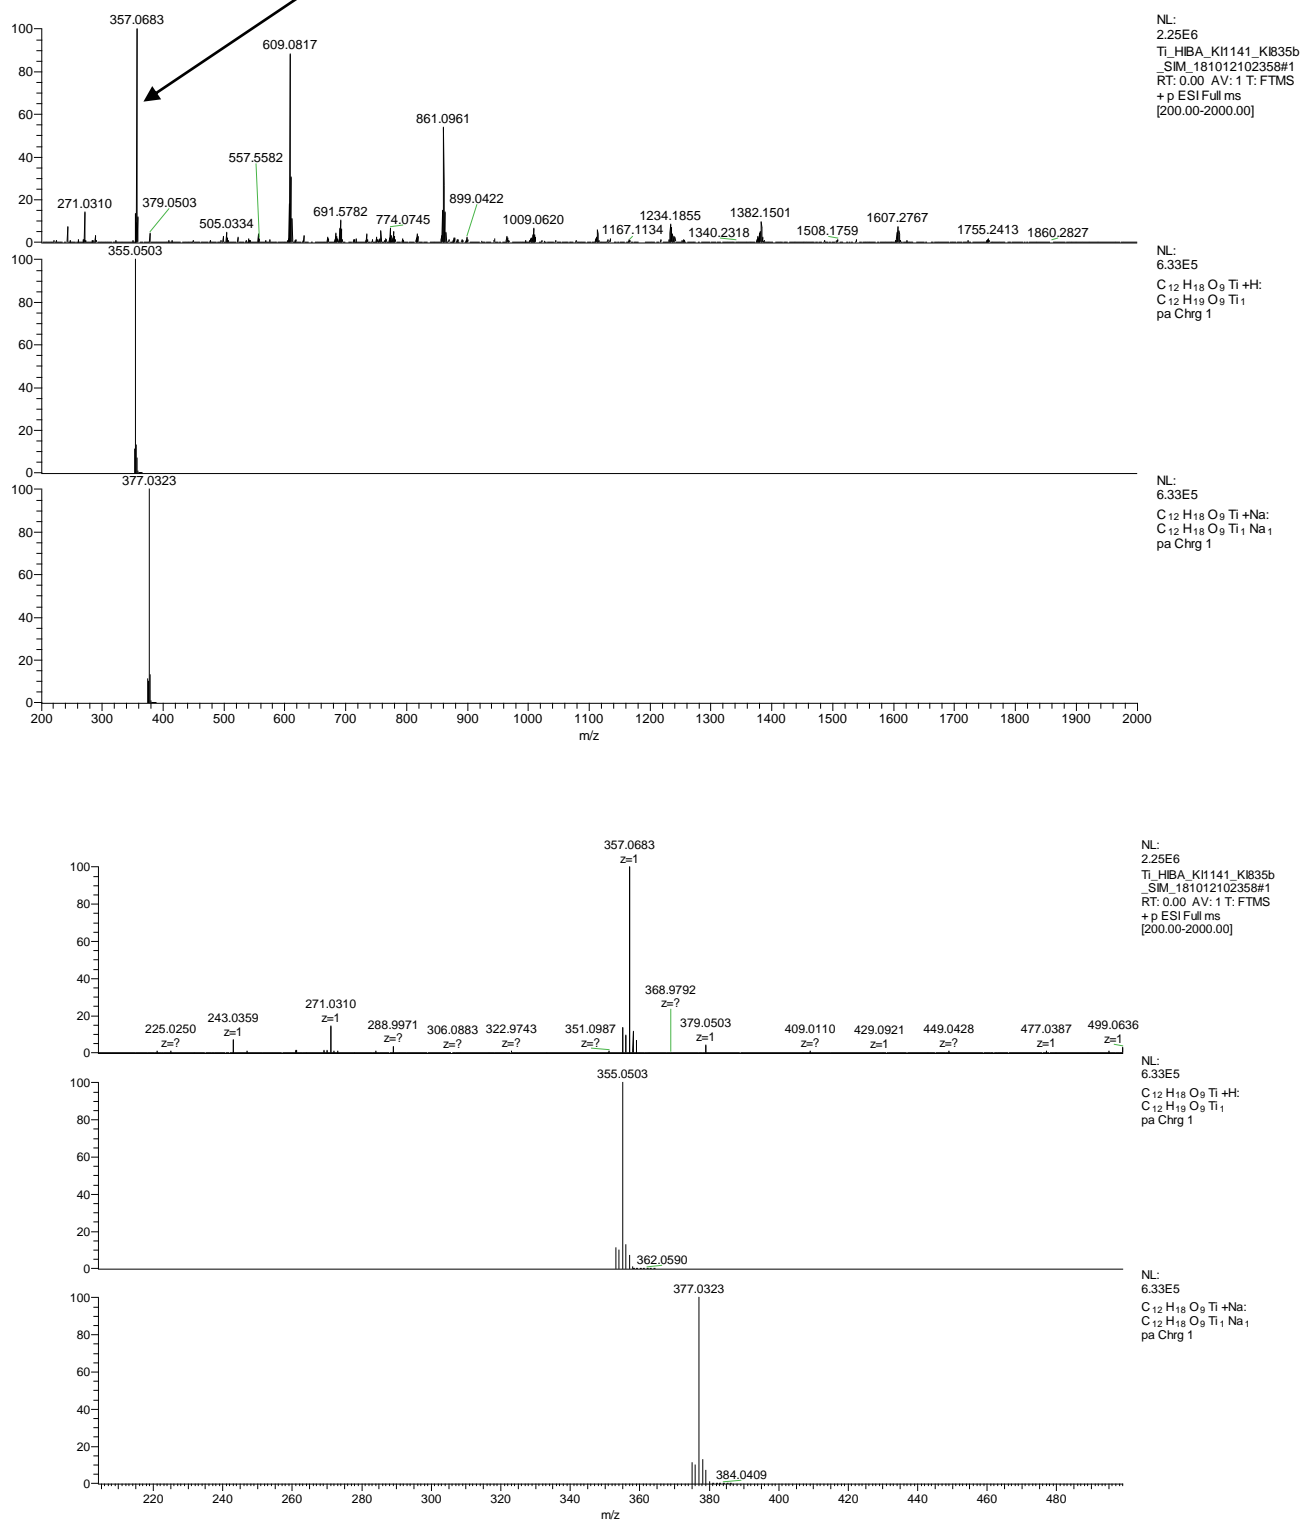

Figure S1

$M_2 = [Ti(L_1)_3((CH_6N_3)_2)]$ , ( $m/z = 475.1627$ ,  $z = 1$ ,  $[M_2H]^+$ )

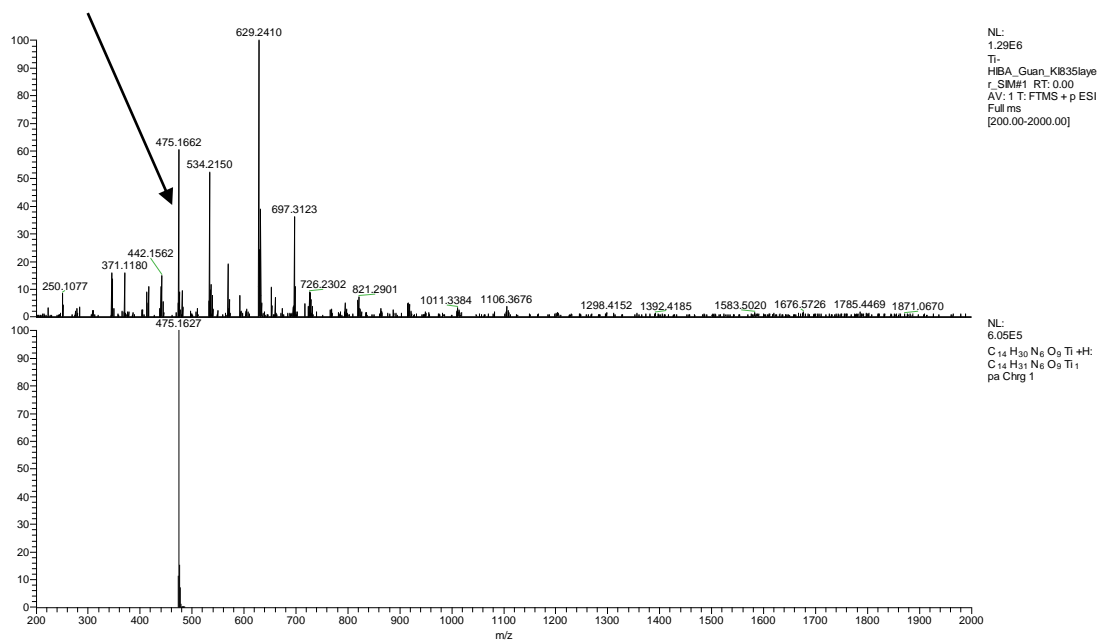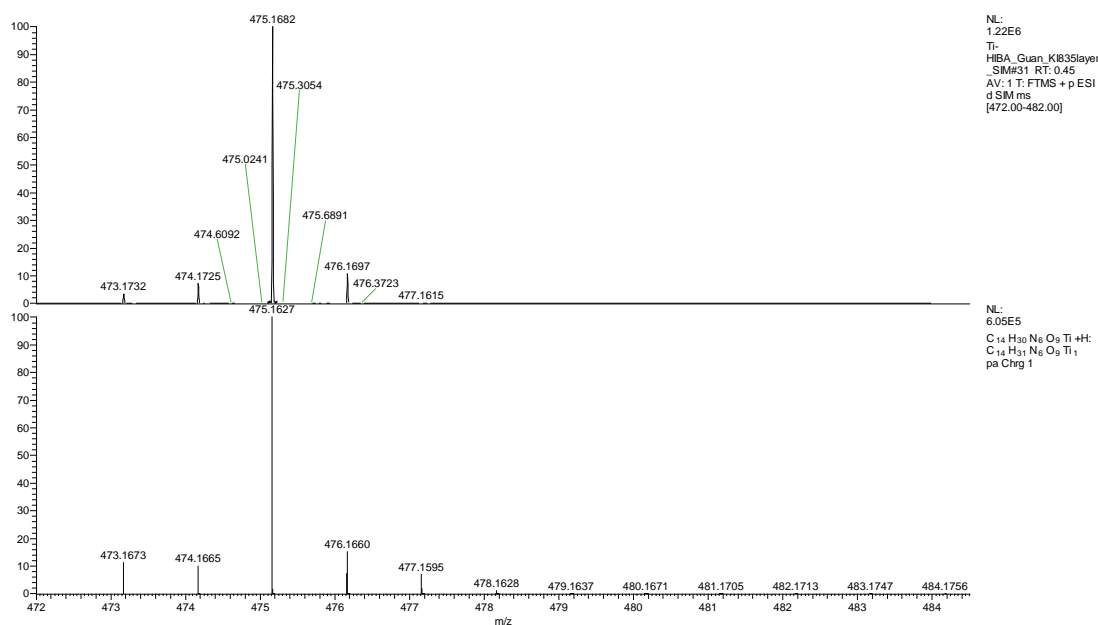

Figure S2

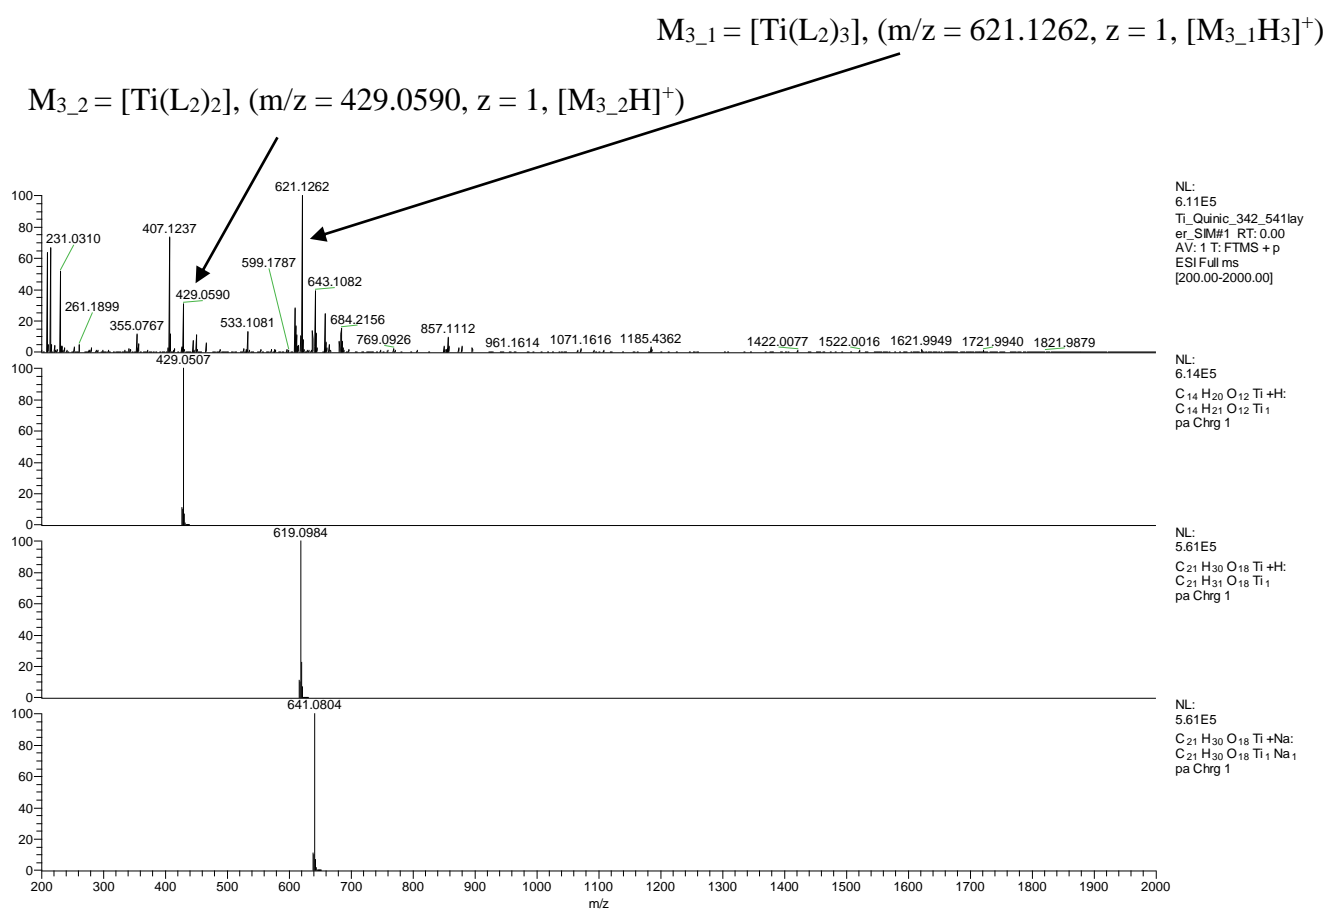

**Figure S3**

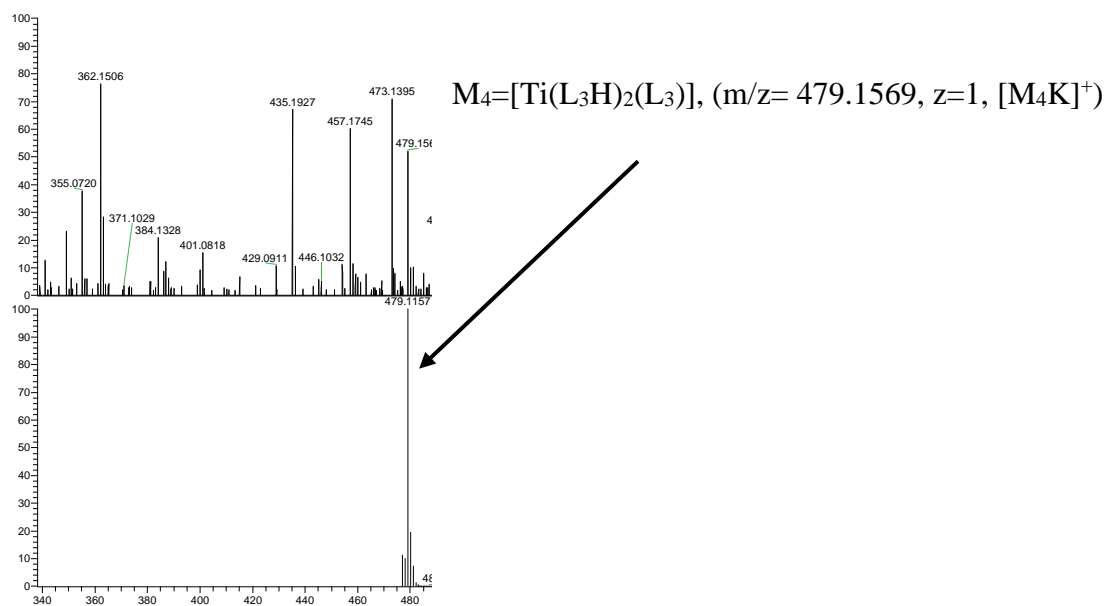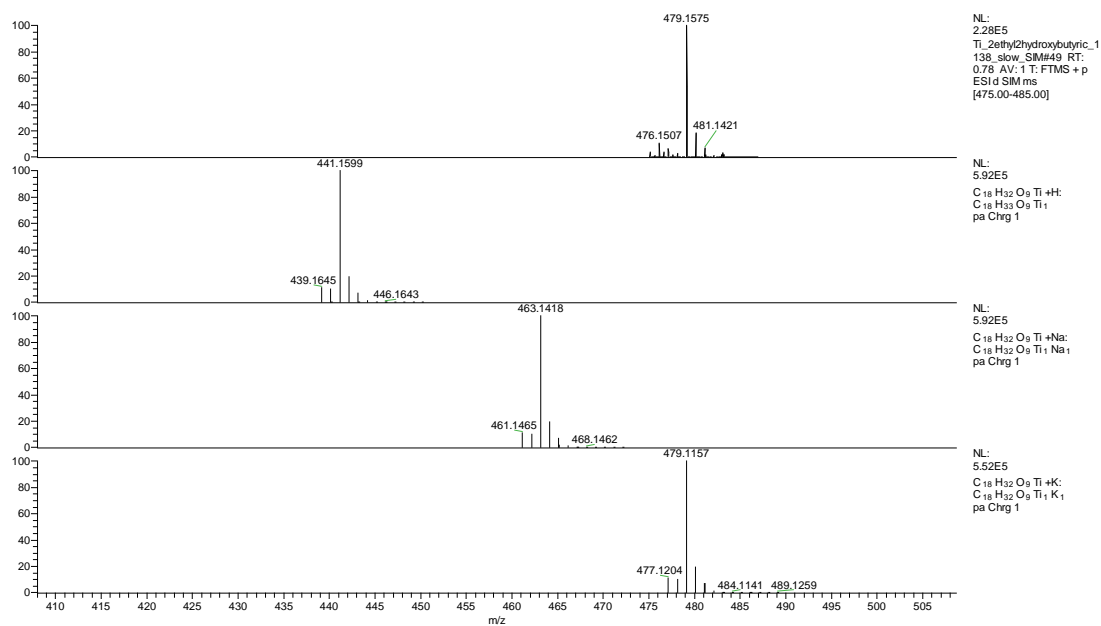

**Figure S4**
