# Supplementary material for: Structural Speciation of Ti(IV)-(α-Hydroxycarboxylic Acid) Complexes in Metabolism-Related (Patho)Physiology—In Vitro Approaches to (Pre)Adipocyte Differentiation and Mineralization
Source: MDPI journal article supplement (doi:10.3390/ijms241411865), 2023-07-24
Supplement: s1 [file s1]

**Table S4**

## Experimental details

|                                                                                                                |                                                                                 |
|----------------------------------------------------------------------------------------------------------------|---------------------------------------------------------------------------------|
| Crystal data                                                                                                   |                                                                                 |
| Chemical formula                                                                                               | C <sub>28</sub> H <sub>66</sub> N <sub>12</sub> O <sub>21</sub> Ti <sub>2</sub> |
| <i>M</i> <sub>r</sub>                                                                                          | 1002.70                                                                         |
| Crystal system, space group                                                                                    | Monoclinic, <i>P</i> 2 <sub>1</sub> / <i>n</i>                                  |
| Temperature (K)                                                                                                | 295                                                                             |
| <i>a</i> , <i>b</i> , <i>c</i> (Å)                                                                             | 21.458 (7), 10.212 (3), 23.248 (7)                                              |
| β (°)                                                                                                          | 94.828 (8)                                                                      |
| <i>V</i> (Å <sup>3</sup> )                                                                                     | 5076 (3)                                                                        |
| <i>Z</i>                                                                                                       | 4                                                                               |
| Radiation type                                                                                                 | Mo <i>K</i> α                                                                   |
| μ (mm <sup>-1</sup> )                                                                                          | 0.39                                                                            |
| Crystal size (mm)                                                                                              | 0.22 × 0.13 × 0.11                                                              |
| Data collection                                                                                                |                                                                                 |
| Diffractometer                                                                                                 | Bruker Kappa Apex2                                                              |
| Absorption correction                                                                                          | Numerical<br>Analytical Absorption (De Meulenaer & Tompa, 1965)                 |
| <i>T</i> <sub>min</sub> , <i>T</i> <sub>max</sub>                                                              | 0.95, 0.96                                                                      |
| No. of measured, independent and<br>observed [ <i>I</i> > 2.0σ( <i>I</i> )] reflections                        | 63319, 9628, 6040                                                               |
| <i>R</i> <sub>int</sub>                                                                                        | 0.057                                                                           |
| (sin θ/λ) <sub>max</sub> (Å <sup>-1</sup> )                                                                    | 0.613                                                                           |
| Refinement                                                                                                     |                                                                                 |
| <i>R</i> [ <i>F</i> <sup>2</sup> > 2σ( <i>F</i> <sup>2</sup> )], <i>wR</i> ( <i>F</i> <sup>2</sup> ), <i>S</i> | 0.052, 0.088, 1.00                                                              |
| No. of reflections                                                                                             | 6040                                                                            |
| No. of parameters                                                                                              | 568                                                                             |
| H-atom treatment                                                                                               | H-atom parameters constrained                                                   |
| Δρ <sub>max</sub> , Δρ <sub>min</sub> (e Å <sup>-3</sup> )                                                     | 0.53, -0.39                                                                     |

Computer programs: Apex2 (Bruker AXS, 2006), *SUPERFLIP* (Palatinus & Chapuis, 2007), *CRYSTALS* (Betteridge *et al.*, 2003), *CAMERON* (Watkin *et al.*, 1996).

**Table S5**

## Selected geometric parameters (Å, °)

|        |           |       |           |
|--------|-----------|-------|-----------|
| Ti1—O1 | 2.065 (2) | C1—C2 | 1.536 (4) |
| Ti1—O3 | 1.856 (2) | C2—C3 | 1.517 (5) |
| Ti1—O4 | 2.070 (2) | C2—C4 | 1.509 (5) |

|           |             |            |           |
|-----------|-------------|------------|-----------|
| Ti1—O6    | 1.861 (2)   | C5—C6      | 1.520 (5) |
| Ti1—O7    | 2.052 (2)   | C6—C7      | 1.562 (6) |
| Ti1—O9    | 1.860 (2)   | C6—C8      | 1.476 (6) |
| Ti2—O10   | 2.048 (2)   | C9—C10     | 1.526 (4) |
| Ti2—O12   | 1.878 (2)   | C10—C11    | 1.505 (5) |
| Ti2—O13   | 2.061 (2)   | C10—C12    | 1.532 (5) |
| Ti2—O15   | 1.874 (2)   | C13—C14    | 1.530 (5) |
| Ti2—O16   | 2.072 (2)   | C14—C15    | 1.504 (5) |
| Ti2—O18   | 1.827 (2)   | C14—C16    | 1.505 (5) |
| O1—C1     | 1.291 (4)   | C17—C18    | 1.523 (5) |
| O2—C1     | 1.225 (4)   | C18—C19    | 1.540 (5) |
| O3—C2     | 1.427 (4)   | C18—C20    | 1.531 (5) |
| O4—C5     | 1.289 (4)   | C21—C22    | 1.539 (4) |
| O5—C5     | 1.233 (4)   | C22—C23    | 1.528 (5) |
| O6—C6     | 1.405 (4)   | C22—C24    | 1.547 (5) |
| O7—C9     | 1.271 (4)   | C25—N1     | 1.324 (4) |
| O8—C9     | 1.244 (4)   | C25—N2     | 1.320 (4) |
| O9—C10    | 1.422 (4)   | C25—N3     | 1.307 (4) |
| O10—C13   | 1.306 (4)   | C26—N4     | 1.295 (5) |
| O11—C13   | 1.223 (4)   | C26—N5     | 1.313 (5) |
| O12—C14   | 1.425 (4)   | C26—N6     | 1.310 (5) |
| O13—C17   | 1.283 (4)   | C27—N7     | 1.309 (4) |
| O14—C17   | 1.228 (4)   | C27—N8     | 1.307 (4) |
| O15—C18   | 1.386 (4)   | C27—N9     | 1.323 (4) |
| O16—C21   | 1.298 (4)   | C28—N10    | 1.308 (5) |
| O17—C21   | 1.238 (4)   | C28—N11    | 1.339 (4) |
| O18—C22   | 1.410 (4)   | C28—N12    | 1.293 (5) |
| O1—Ti1—O3 | 79.17 (9)   | C5—C6—O6   | 108.7 (3) |
| O1—Ti1—O4 | 80.80 (8)   | C5—C6—C7   | 107.5 (3) |
| O3—Ti1—O4 | 159.23 (9)  | O6—C6—C7   | 107.6 (3) |
| O1—Ti1—O6 | 100.37 (10) | C5—C6—C8   | 111.3 (3) |
| O3—Ti1—O6 | 99.60 (10)  | O6—C6—C8   | 110.2 (3) |
| O4—Ti1—O6 | 78.67 (9)   | C7—C6—C8   | 111.4 (4) |
| O1—Ti1—O7 | 81.86 (9)   | O7—C9—O8   | 124.3 (3) |
| O3—Ti1—O7 | 98.51 (9)   | O7—C9—C10  | 115.1 (3) |
| O4—Ti1—O7 | 83.97 (8)   | O8—C9—C10  | 120.5 (3) |
| O6—Ti1—O7 | 161.85 (9)  | C9—C10—O9  | 107.1 (2) |
| O1—Ti1—O9 | 160.92 (9)  | C9—C10—C11 | 109.8 (3) |

|             |             |             |           |
|-------------|-------------|-------------|-----------|
| O3—Ti1—O9   | 101.20 (9)  | O9—C10—C11  | 109.8 (3) |
| O4—Ti1—O9   | 99.53 (9)   | C9—C10—C12  | 108.6 (3) |
| O6—Ti1—O9   | 98.37 (10)  | O9—C10—C12  | 108.3 (3) |
| O7—Ti1—O9   | 79.22 (9)   | C11—C10—C12 | 113.1 (3) |
| O10—Ti2—O12 | 78.78 (9)   | O10—C13—O11 | 123.5 (3) |
| O10—Ti2—O13 | 80.55 (9)   | O10—C13—C14 | 113.6 (3) |
| O12—Ti2—O13 | 100.63 (10) | O11—C13—C14 | 122.9 (3) |
| O10—Ti2—O15 | 158.26 (10) | C13—C14—O12 | 107.4 (3) |
| O12—Ti2—O15 | 99.05 (10)  | C13—C14—C15 | 109.3 (3) |
| O13—Ti2—O15 | 78.60 (9)   | O12—C14—C15 | 109.7 (3) |
| O10—Ti2—O16 | 82.84 (9)   | C13—C14—C16 | 107.5 (3) |
| O12—Ti2—O16 | 160.96 (9)  | O12—C14—C16 | 109.5 (3) |
| O13—Ti2—O16 | 81.08 (9)   | C15—C14—C16 | 113.3 (3) |
| O15—Ti2—O16 | 99.87 (9)   | O13—C17—O14 | 122.9 (3) |
| O10—Ti2—O18 | 99.39 (10)  | O13—C17—C18 | 113.8 (3) |
| O12—Ti2—O18 | 99.36 (10)  | O14—C17—C18 | 123.3 (3) |
| O13—Ti2—O18 | 159.58 (9)  | C17—C18—O15 | 109.1 (3) |
| O15—Ti2—O18 | 102.29 (10) | C17—C18—C19 | 108.5 (3) |
| O16—Ti2—O18 | 78.67 (9)   | O15—C18—C19 | 110.4 (3) |
| Ti1—O1—C1   | 116.30 (19) | C17—C18—C20 | 109.6 (3) |
| Ti1—O3—C2   | 122.42 (16) | O15—C18—C20 | 108.0 (3) |
| Ti1—O4—C5   | 116.43 (19) | C19—C18—C20 | 111.3 (3) |
| Ti1—O6—C6   | 122.1 (2)   | O16—C21—O17 | 122.8 (3) |
| Ti1—O7—C9   | 116.42 (19) | O16—C21—C22 | 114.9 (3) |
| Ti1—O9—C10  | 121.64 (17) | O17—C21—C22 | 122.3 (3) |
| Ti2—O10—C13 | 117.3 (2)   | C21—C22—O18 | 105.9 (3) |
| Ti2—O12—C14 | 121.67 (19) | C21—C22—C23 | 110.9 (3) |
| Ti2—O13—C17 | 116.7 (2)   | O18—C22—C23 | 110.4 (3) |
| Ti2—O15—C18 | 121.84 (19) | C21—C22—C24 | 107.1 (3) |
| Ti2—O16—C21 | 115.50 (18) | O18—C22—C24 | 109.9 (3) |
| Ti2—O18—C22 | 124.87 (18) | C23—C22—C24 | 112.5 (3) |
| O1—C1—O2    | 123.1 (3)   | N1—C25—N2   | 119.8 (3) |
| O1—C1—C2    | 114.5 (3)   | N1—C25—N3   | 118.6 (3) |
| O2—C1—C2    | 122.5 (3)   | N2—C25—N3   | 121.5 (3) |
| C1—C2—O3    | 107.1 (2)   | N4—C26—N5   | 119.0 (4) |
| C1—C2—C3    | 108.8 (3)   | N4—C26—N6   | 121.0 (4) |
| O3—C2—C3    | 109.1 (3)   | N5—C26—N6   | 120.0 (4) |
| C1—C2—C4    | 109.9 (3)   | N7—C27—N8   | 120.9 (3) |

|          |           |             |           |
|----------|-----------|-------------|-----------|
| O3—C2—C4 | 109.4 (3) | N7—C27—N9   | 118.9 (3) |
| C3—C2—C4 | 112.4 (3) | N8—C27—N9   | 120.2 (3) |
| O4—C5—O5 | 123.3 (3) | N10—C28—N11 | 117.6 (4) |
| O4—C5—C6 | 113.9 (3) | N10—C28—N12 | 122.4 (3) |
| O5—C5—C6 | 122.8 (3) | N11—C28—N12 | 119.9 (3) |

**Table S6**

Hydrogen-bond geometry (Å, °)

| <i>D</i> —H··· <i>A</i>       | <i>D</i> —H | H··· <i>A</i> | <i>D</i> ··· <i>A</i> | <i>D</i> —H··· <i>A</i> |
|-------------------------------|-------------|---------------|-----------------------|-------------------------|
| O19—H259···O15 <sup>i</sup>   | 0.82        | 2.06          | 2.844 (5)             | 160                     |
| O19—H258···O6                 | 0.83        | 2.24          | 2.855 (5)             | 131                     |
| O20—H256···O19                | 0.83        | 2.46          | 3.277 (5)             | 168                     |
| O20—H257···O12 <sup>i</sup>   | 0.83        | 2.04          | 2.763 (5)             | 145                     |
| N2—H21···O8 <sup>ii</sup>     | 0.86        | 2.18          | 2.933 (5)             | 146                     |
| N2—H22···O3                   | 0.84        | 2.18          | 2.942 (5)             | 150                     |
| N3—H251···O19                 | 0.86        | 2.08          | 2.921 (5)             | 165                     |
| N3—H250···O17 <sup>iii</sup>  | 0.86        | 2.08          | 2.941 (5)             | 173                     |
| N1—H11···O8 <sup>ii</sup>     | 0.87        | 2.25          | 2.977 (5)             | 141                     |
| N1—H12···O16 <sup>iii</sup>   | 0.88        | 2.02          | 2.883 (5)             | 165                     |
| N11—H253···O20 <sup>i</sup>   | 0.85        | 2.08          | 2.858 (5)             | 153                     |
| N11—H252···O5 <sup>iv</sup>   | 0.85        | 2.16          | 2.948 (5)             | 153                     |
| N10—H101···O11 <sup>v</sup>   | 0.86        | 2.58          | 3.291 (5)             | 140                     |
| N10—H102···O2                 | 0.86        | 2.12          | 2.980 (5)             | 176                     |
| N12—H254···O5 <sup>iv</sup>   | 0.86        | 2.35          | 3.091 (5)             | 145                     |
| N12—H255···O1                 | 0.86        | 2.05          | 2.887 (5)             | 165                     |
| O21—H212···O17 <sup>iii</sup> | 0.82        | 2.21          | 3.008 (5)             | 165                     |
| O21—H211···O9                 | 0.82        | 2.20          | 2.985 (5)             | 158                     |
| N8—H246···O5 <sup>vi</sup>    | 0.87        | 2.15          | 2.992 (5)             | 164                     |
| N8—H247···O2                  | 0.86        | 2.10          | 2.882 (5)             | 152                     |
| N9—H91···O13 <sup>v</sup>     | 0.86        | 2.06          | 2.914 (5)             | 172                     |
| N7—H245···O14 <sup>v</sup>    | 0.87        | 2.04          | 2.904 (5)             | 171                     |
| N7—H244···O4 <sup>vi</sup>    | 0.85        | 2.33          | 2.980 (5)             | 133                     |
| N4—H249···O21 <sup>ii</sup>   | 0.86        | 2.27          | 3.064 (5)             | 153                     |
| N4—H248···O10 <sup>v</sup>    | 0.87        | 2.10          | 2.879 (5)             | 149                     |
| N5—H51···O21 <sup>ii</sup>    | 0.86        | 2.37          | 3.141 (5)             | 149                     |
| N5—H52···O8                   | 0.88        | 2.07          | 2.914 (5)             | 162                     |
| N6—H61···O11 <sup>v</sup>     | 0.86        | 2.13          | 2.971 (5)             | 166                     |
| N6—H62···O14 <sup>vii</sup>   | 0.87        | 2.30          | 2.913 (5)             | 128                     |

Symmetry codes: (i)  $-x+1, -y+1, -z+1$ ; (ii)  $-x+1/2, y+1/2, -z+3/2$ ; (iii)  $x-1, y, z$ ; (iv)  $-x+1, -y, -z+1$ ; (v)  $-x+3/2, y+1/2, -z+3/2$ ; (vi)  $x, y+1, z$ ; (vii)  $-x+3/2, y-1/2, -z+3/2$ .

Supporting information

## ► Crystallographic data

Acknowledgements

Funding information

References

43. Bruker Analytical X-ray Systems, Inc. Apex2, Version 2 User Manual, M86-E01078; Bruker Analytical X-ray Systems, Inc: Madison, WI, USA, 2006.
46. Betteridge, P.W.; Carruthers, J.R.; Cooper, R.I.; Prout, K.; Watkin, D.J.J. CRYSTALS version 12: software for guided crystal structure analysis. *Appl. Cryst.* 2003, 36, 1487. <https://doi.org/10.1107/S0021889803021800>.
49. De Meulenaer, J.; Tompa, H. The absorption correction in crystal structure analysis. *Acta Cryst.* **1965**, 19, 1014–1018. <https://doi.org/10.1107/S0365110X65004802>.
50. Prince, E. *Mathematical Techniques in Crystallography and Materials Science*; Springer: New York, NY, USA, 1982.
51. Watkin, D.J. The control of difficult refinements. *Acta Cryst.* **1994**, A50, 411–437. <https://doi.org/10.1107/S0108767393012784>.
52. Watkin, D.J.; Prout, C.K.; Pearce, L.J. *CAMERON*; Chemical Crystallography Laboratory: Oxford, UK, 1996.
53. Flack, H.D. On enantiomorph-polarity estimation. *Acta Cryst.* **1983**, A39, 876–881. <https://doi.org/10.1107/S0108767383001762>.
